# Supplementary material for: The Resistance of Drosophila melanogaster to Oxidative, Genotoxic, Proteotoxic, Osmotic Stress, Infection, and Starvation Depends on Age According to the Stress Factor
Source: MDPI journal article supplement (doi:10.3390/antiox9121239), 2020-12-07

# **The resistance of *Drosophila melanogaster* to oxidative, genotoxic, proteotoxic, osmotic stress, infection and starvation depends on age according to the stress factor**

**Alexei A. Belyi, Alexey A. Alekseev, Alexander Y. Fedintsev, Stepan N. Balybin, Ekaterina N. Proshkina, Mikhail V. Shaposhnikov and Alexey A. Moskalev**

## **Online Resource 3**

Figures in Online Resource 3 show the results of the original data bootstrapping on the plane (par1, par2). par1 and par2 - model parameters obtained by fitting the data for a certain age.

The dots indicate the results of the original data bootstrapping for different ages (Age = 5, 10, ... 50 days) when exposed to stress (stress factors transcript notation is provided in Online Resource. 4, Table A1). M - male, A - female.

Parameters from BS. Stress=1 Sex=M BS\_mode=2

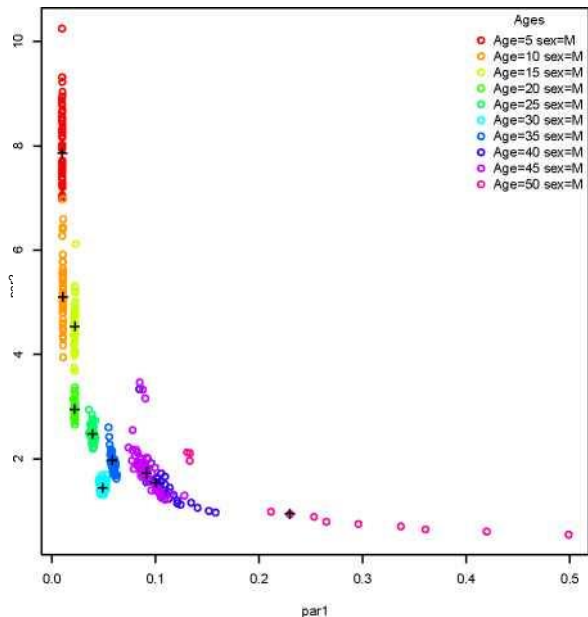

Parameters from BS. Stress=1 Sex=F BS\_mode=2

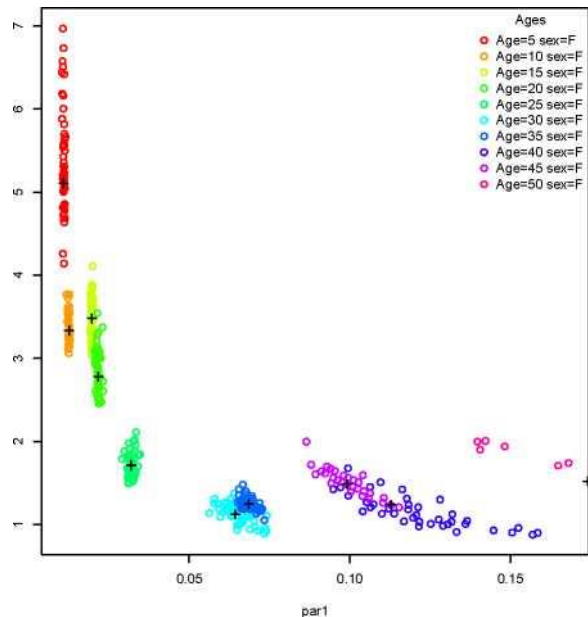

Parameters from BS. Stress=2 Sex=M BS\_mode=2

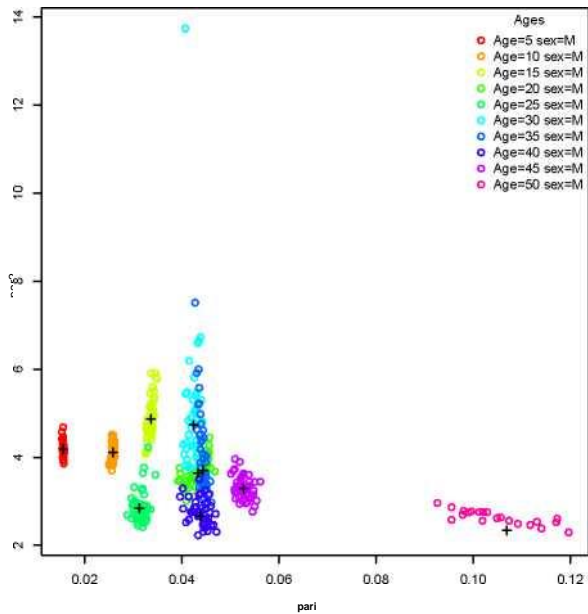

Parameters from BS. Stress=2 Sex=F BS\_mode=2

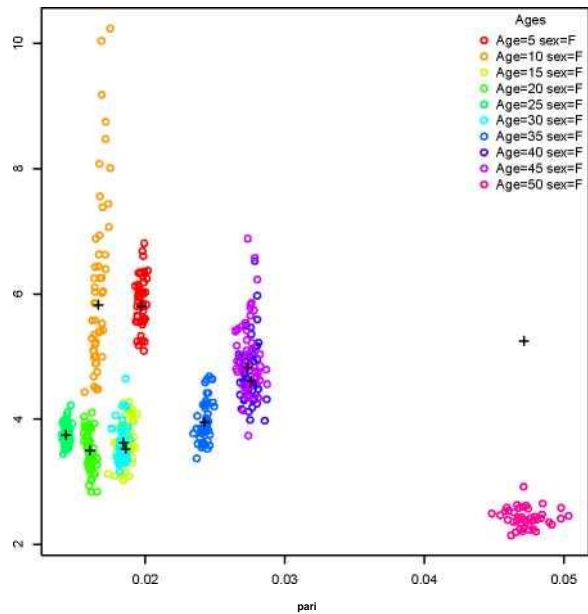

Parameters from BS. Stress=3 Sex=M BS\_mode=2

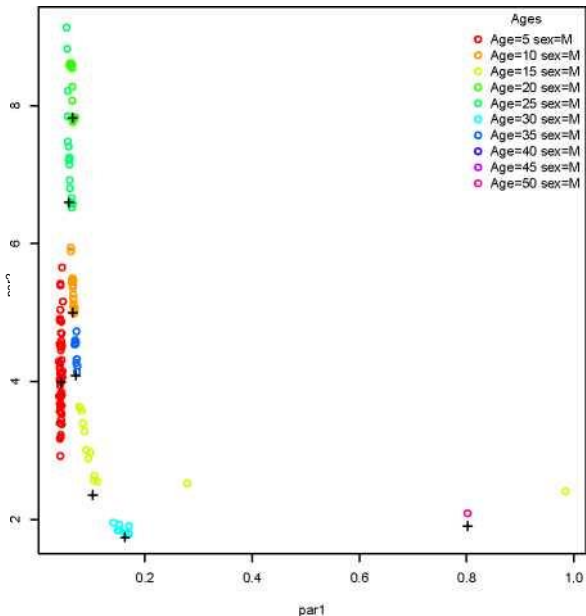

Parameters from BS. Stress=3 Sex=F BS\_mode=2

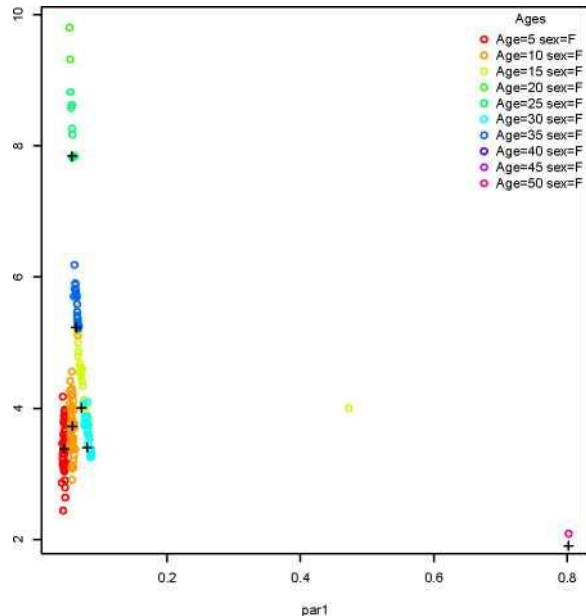

Parameters from BS. Stress=4 Sex=M BS\_mode=2

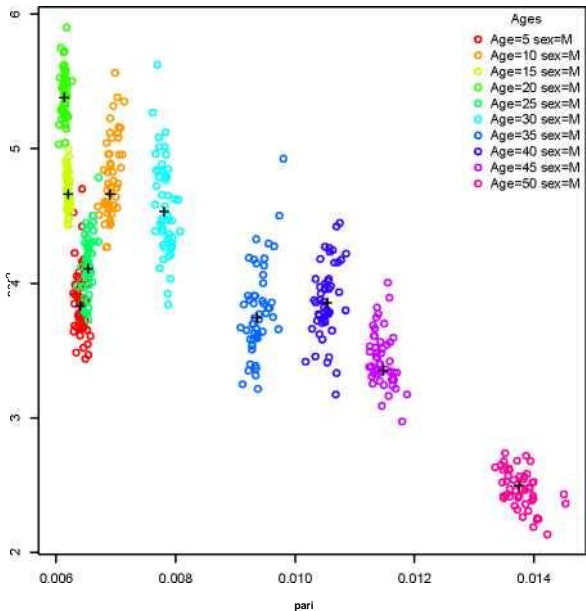

Parameters from BS. Stress=4 Sex=F BS\_mode=2

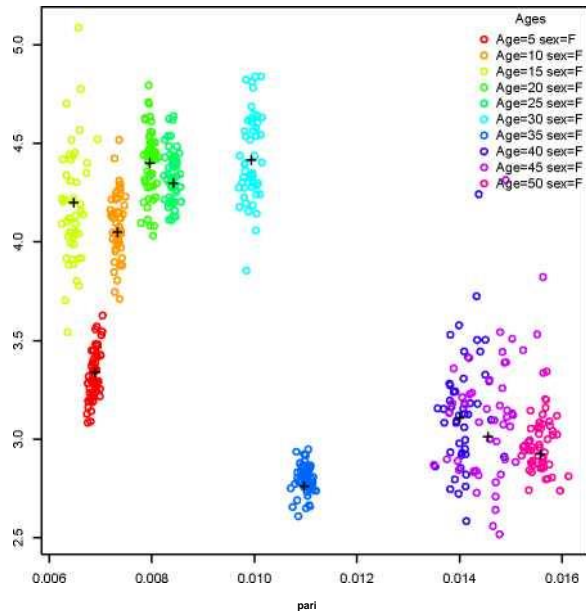

Parameters from BS. Stress=5 Sex=M BS\_mode=2

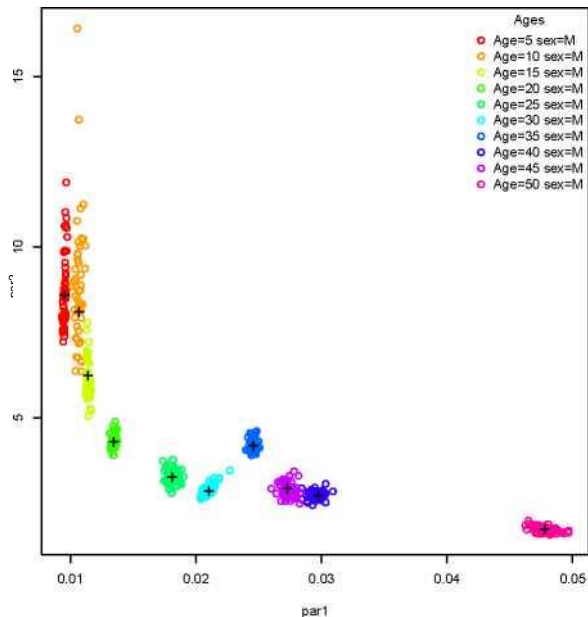

Parameters from BS. Stress=6 Sex=M BS\_mode=2

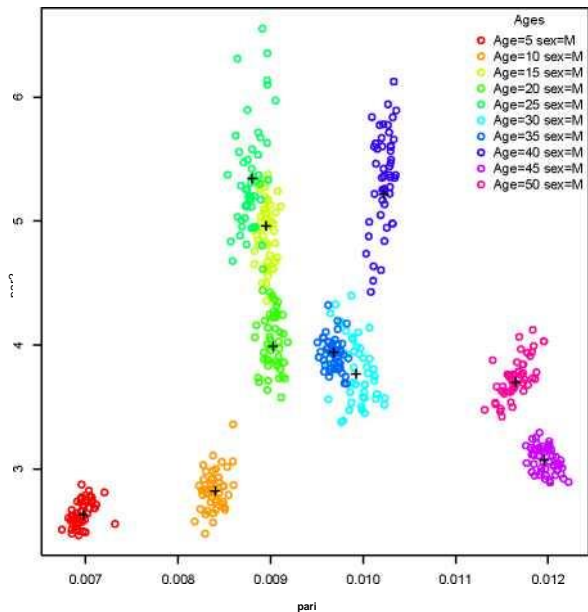

Parameters from BS. Stress=5 Sex=F BS\_mode=2

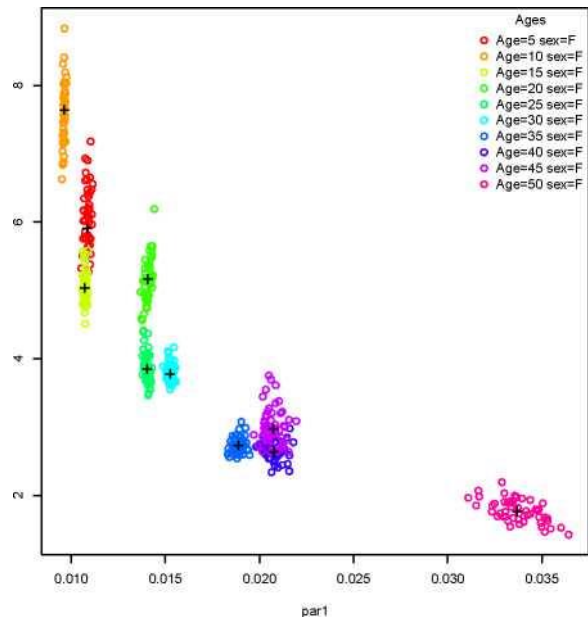

Parameters from BS. Stress=6 Sex=F BS\_mode=2

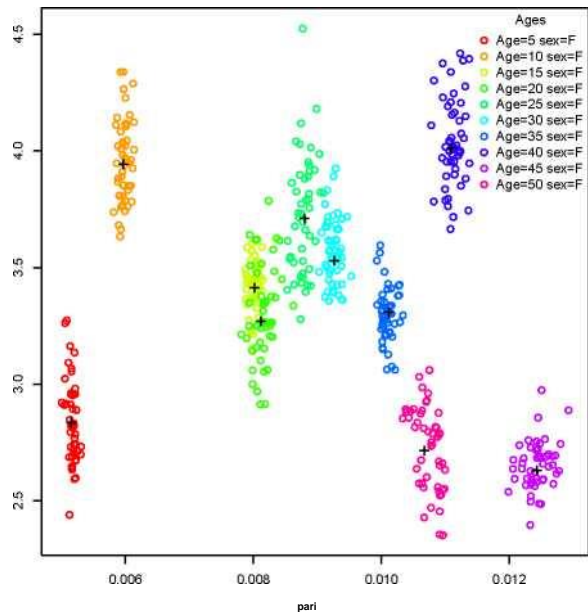

Parameters from BS. Stress=7 Sex=M BS\_mode=2

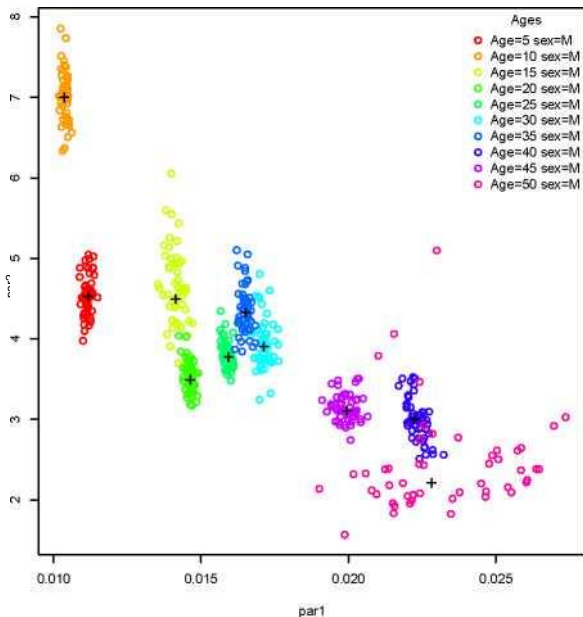

Parameters from BS. Stress=7 Sex=F BS\_mode=2

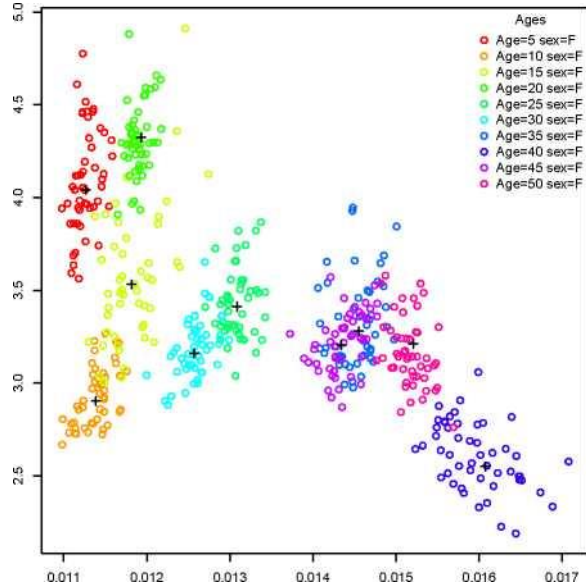

Parameters from BS. Stress=8 Sex=M BS\_mode=2

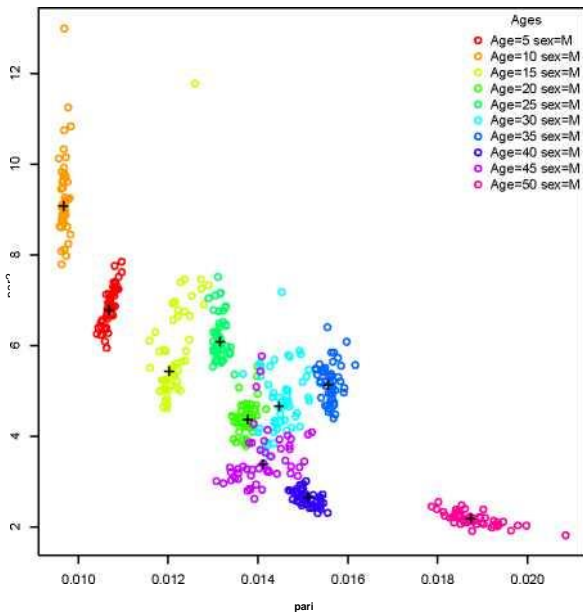

Parameters from BS. Stress=8 Sex=F BS\_mode=2

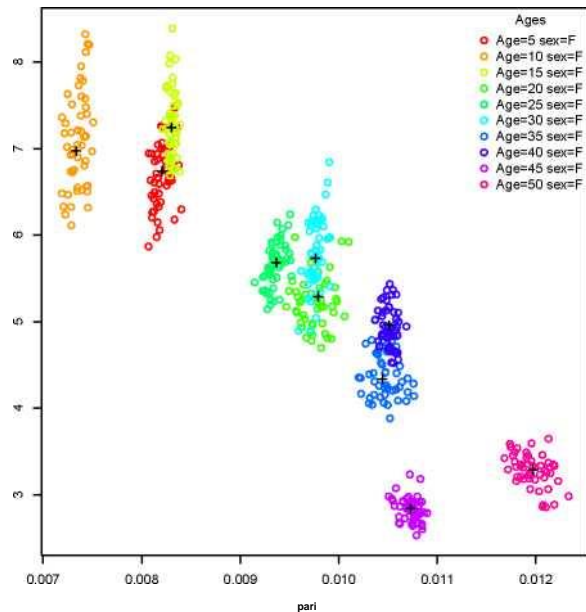

Parameters from BS. Stress=9 Sex=M BS\_mode=2

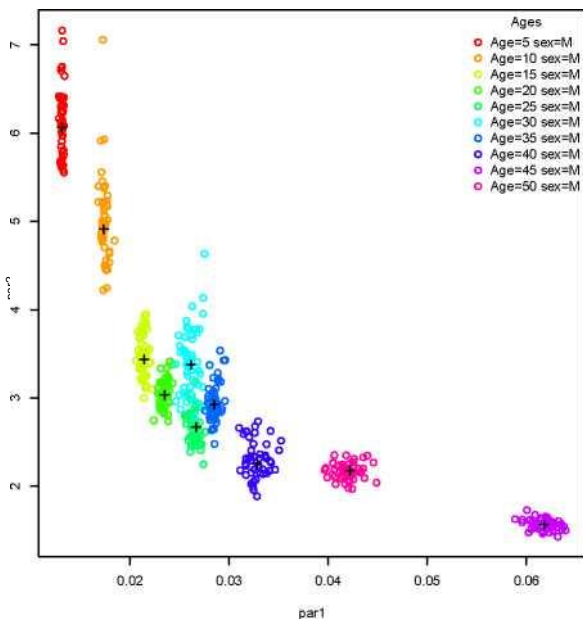

Parameters from BS. Stress=9 Sex=F BS\_mode=2

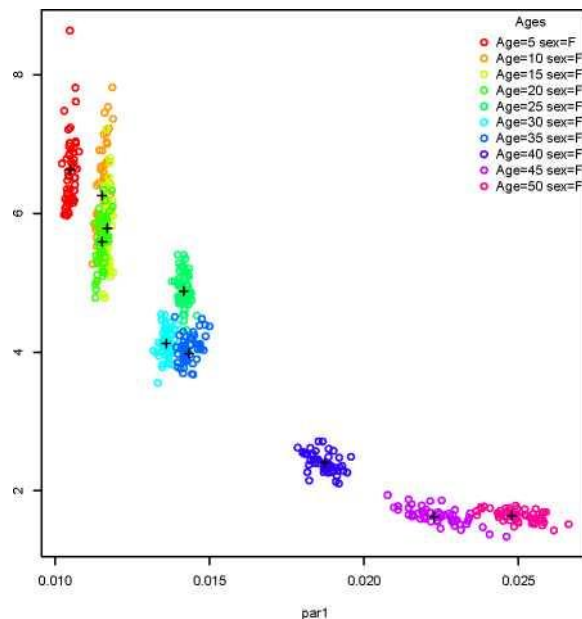

Parameters from BS. Stress=10 Sex=M BS\_mode=2

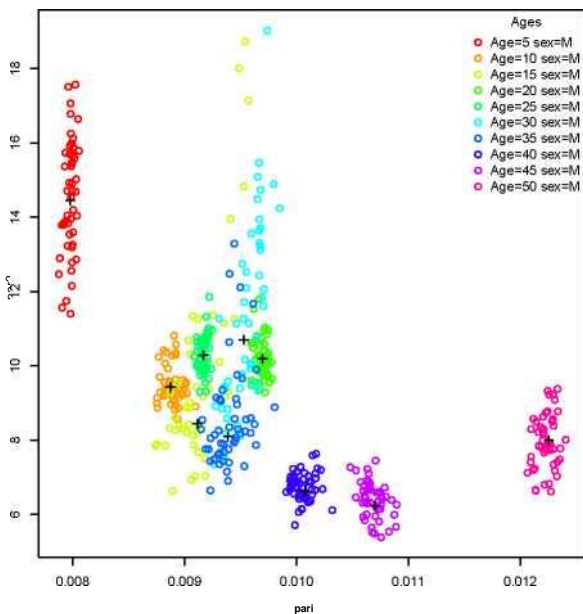

Parameters from BS. Stress=10 Sex=F BS\_mode=2

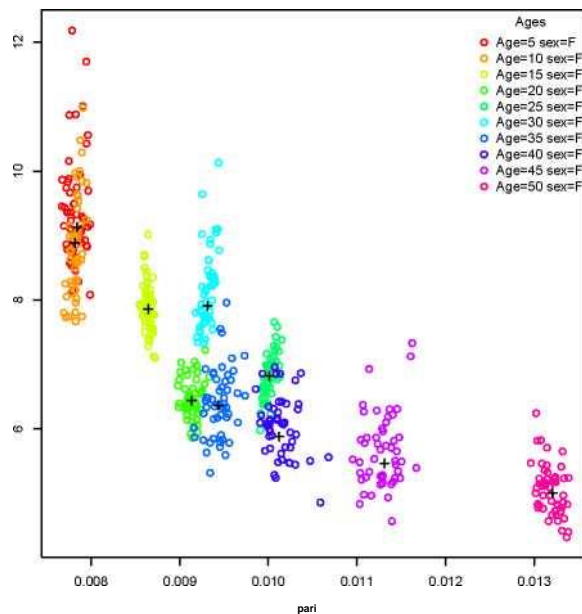

Parameters from BS. Stress=11 Sex=M BS\_mode=2

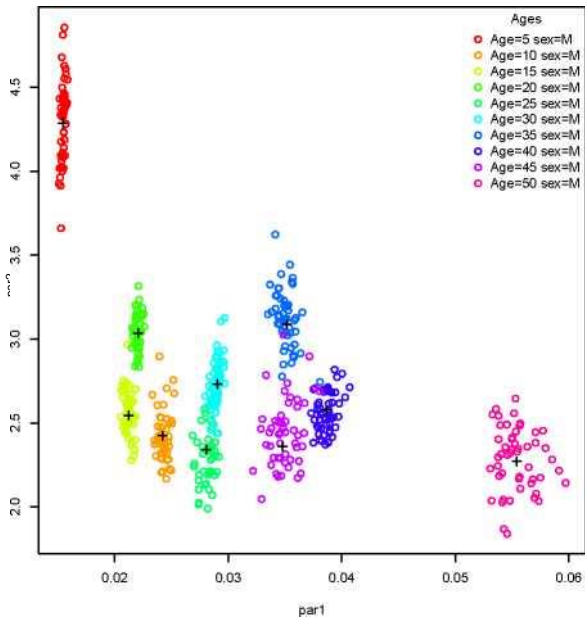

Parameters from BS. Stress=11 Sex=F BS\_mode=2

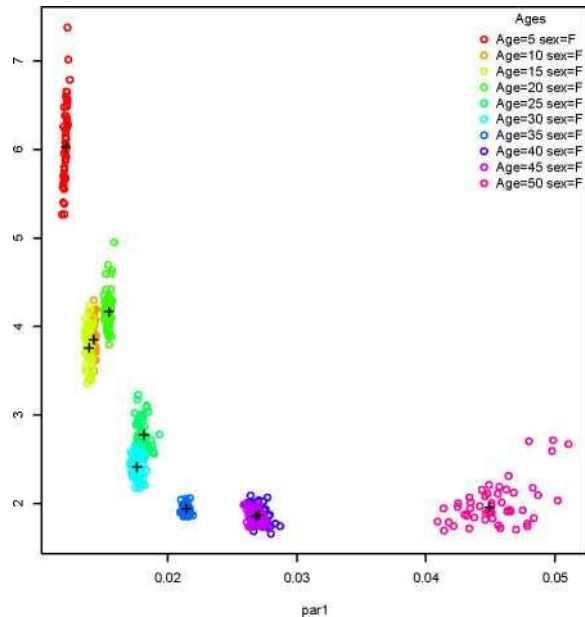

Parameters from BS. Stress=12 Sex=M BS\_mode=2

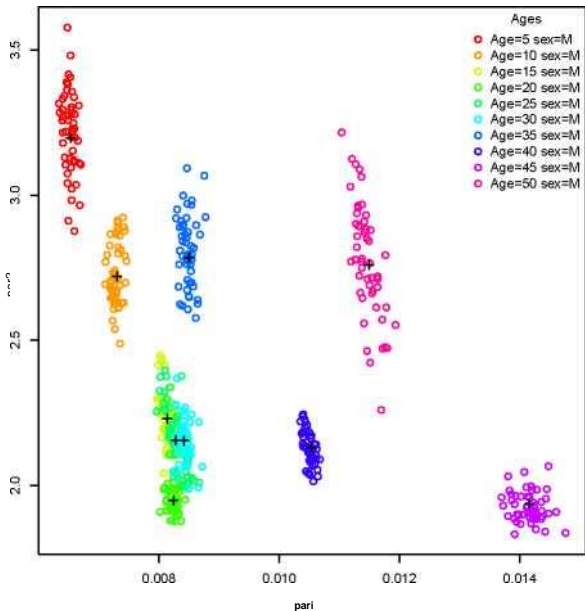

Parameters from BS. Stress=12 Sex=F BS\_mode=2

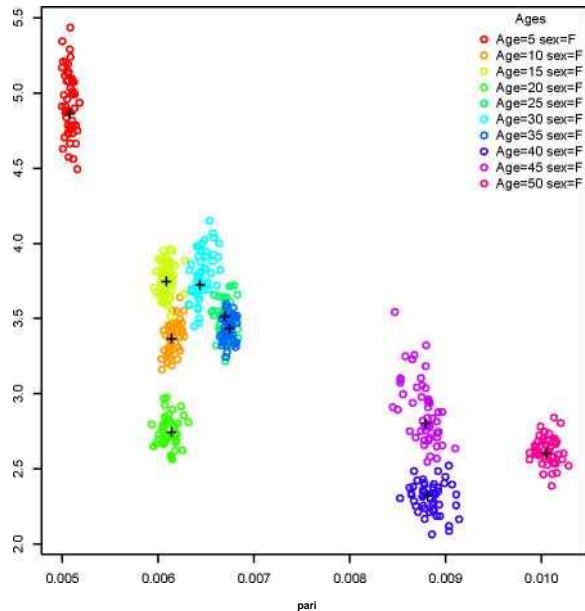



Parameters from BS. Stress=13 Sex=M BS\_mode=2

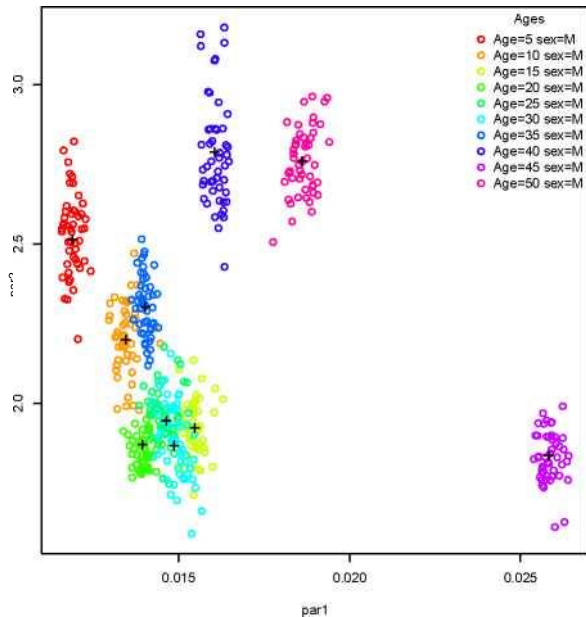

Parameters from BS. Stress=13 Sex=F BS\_mode=2

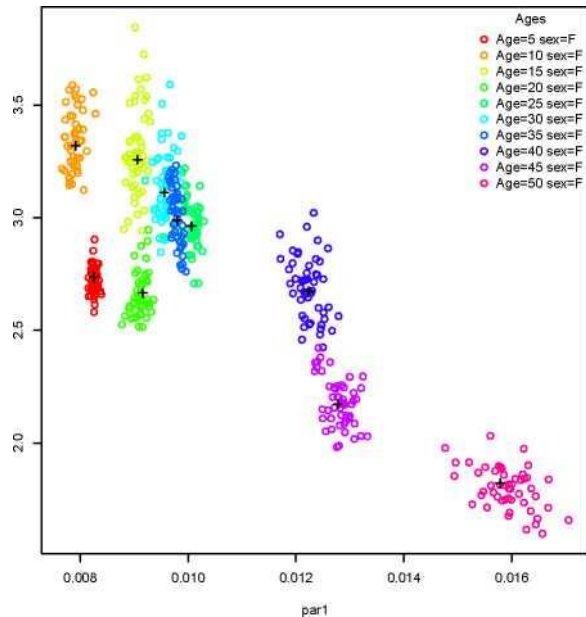

Supplement: s1 [file s1]
