# Supplementary material for: The Resistance of Drosophila melanogaster to Oxidative, Genotoxic, Proteotoxic, Osmotic Stress, Infection, and Starvation Depends on Age According to the Stress Factor
Source: MDPI journal article supplement (doi:10.3390/antiox9121239), 2020-12-07

**The resistance of *Drosophila melanogaster* to oxidative, genotoxic, proteotoxic, osmotic stress, infection and starvation depends on age according to the stress factor**

**Alexei A. Belyi, Alexey A. Alekseev, Alexander Y. Fedintsev, Stepan N. Balybin, Ekaterina N. Proshkina, Mikhail V. Shaposhnikov and Alexey A. Moskalev**

Online Resource 1 contains the figures that show the fitting of the model to experimental data. Red line shows the original reference points, the red bar line connects mean values, the blue dotted line - the model curve.

Live curves. Stress=1

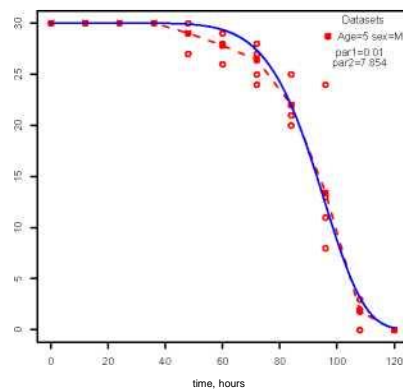

Live curves. Stress=1

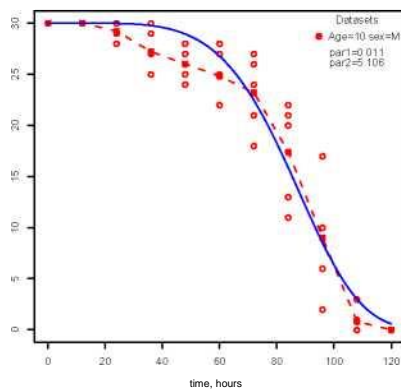

Live curves. Stress=1

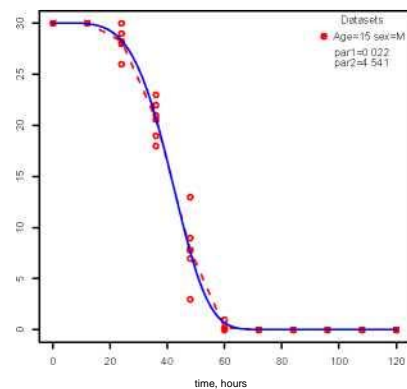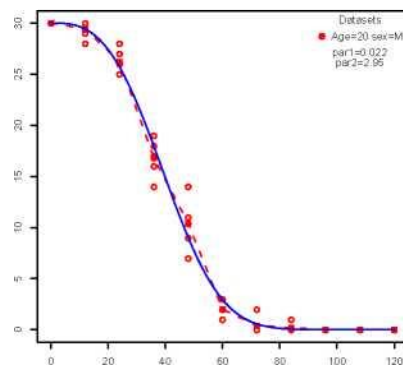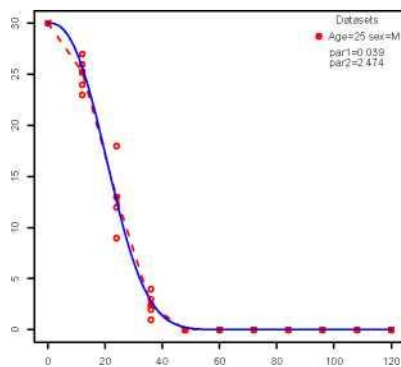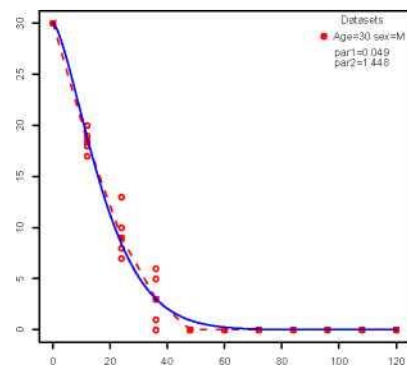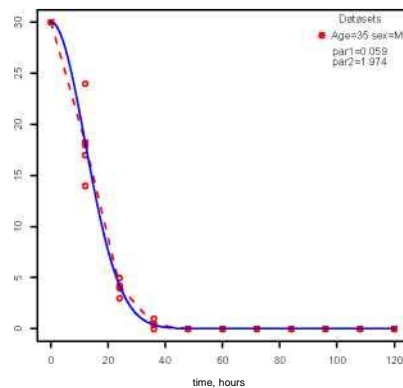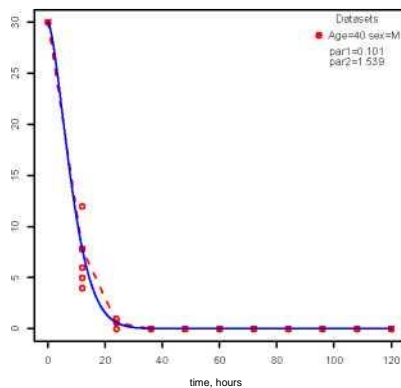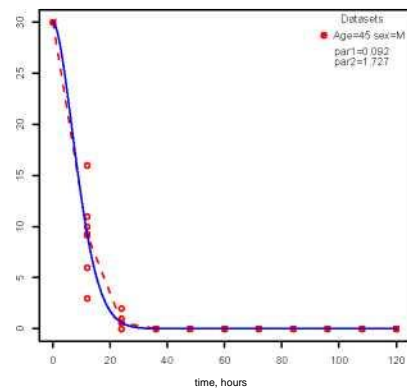

Live curves. Stress=1

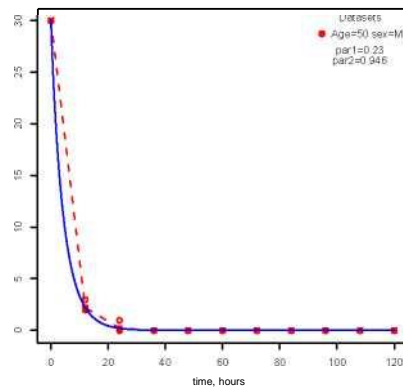

Live curves. Stress=1

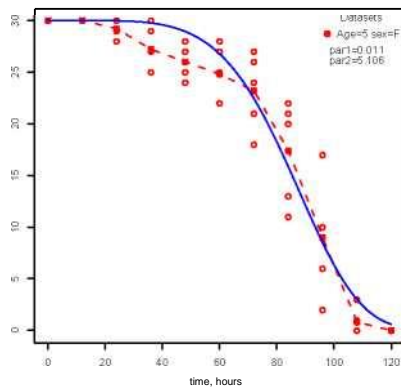

Live curves. Stress=1

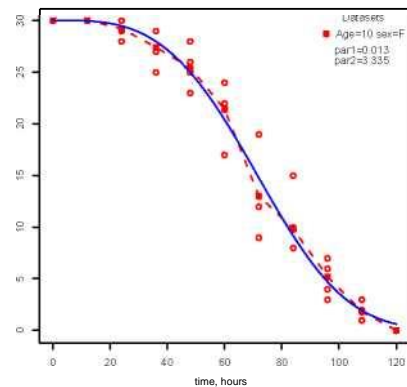

Live curves. Stress=1

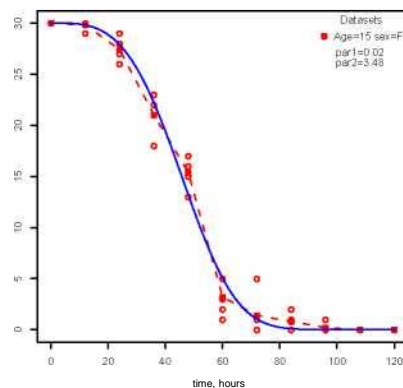

Live curves. Stress=1

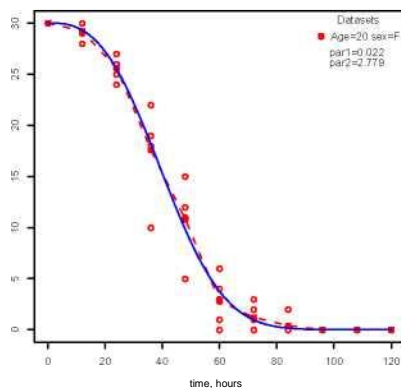

Live curves. Stress=1

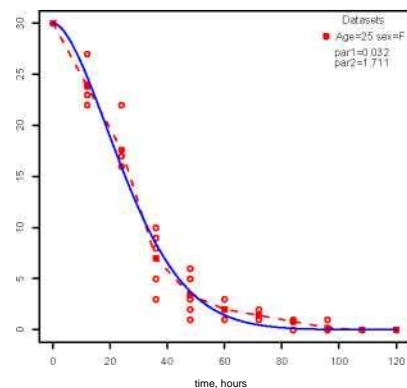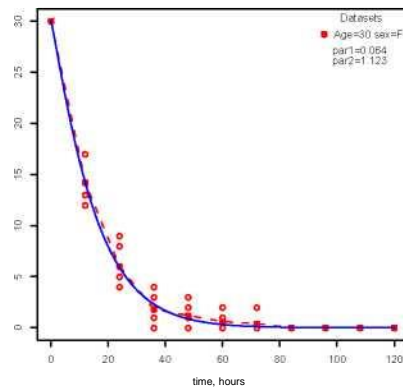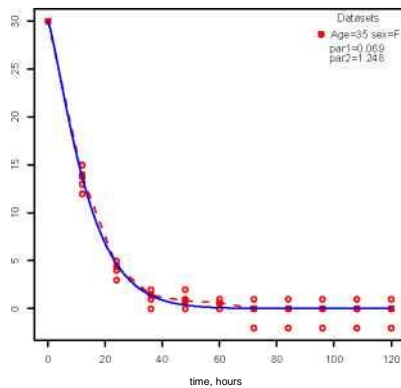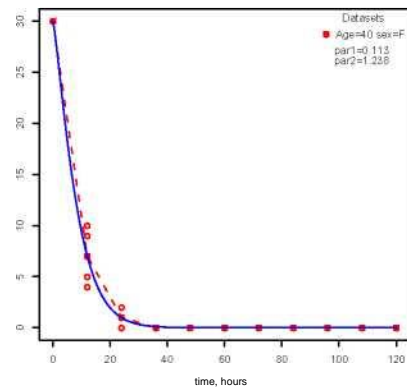

Live curves. Stress=1

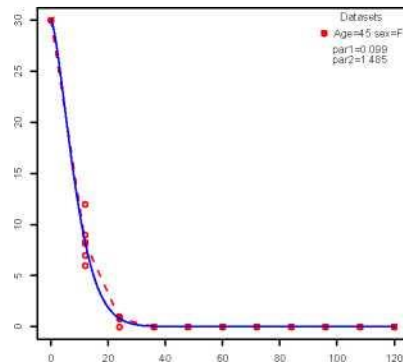

Live curves. Stress=1

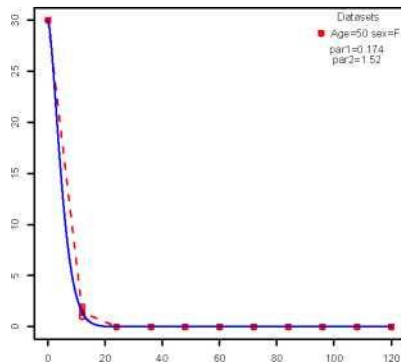

Live curves. Stress=2

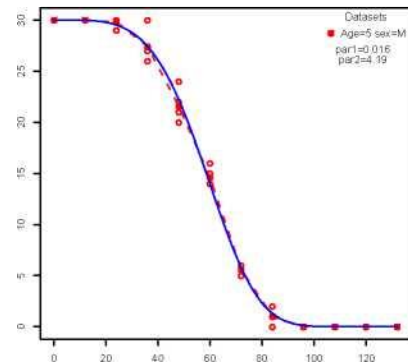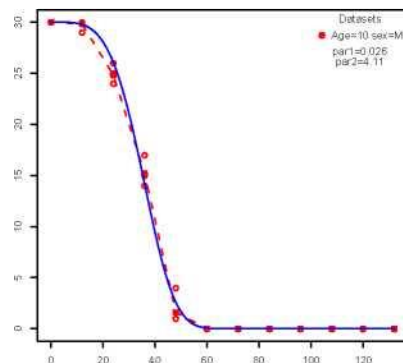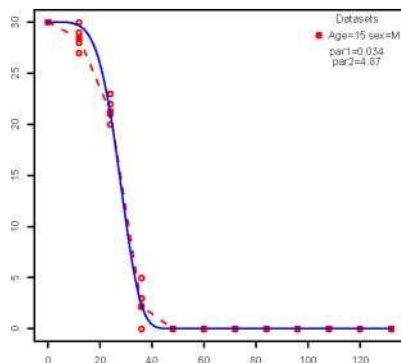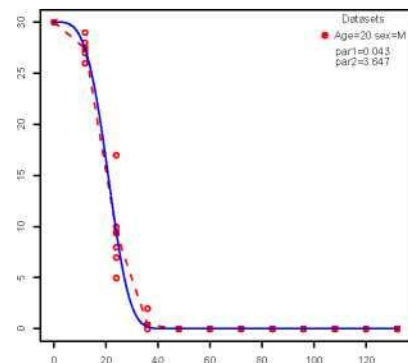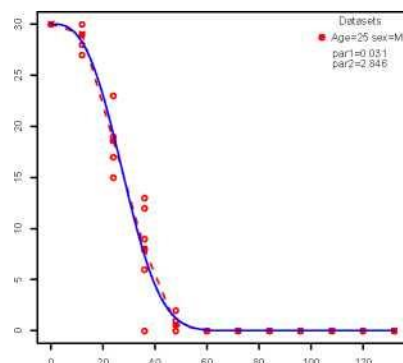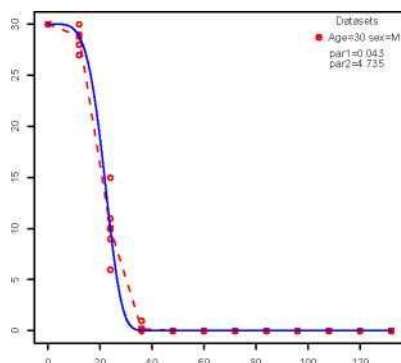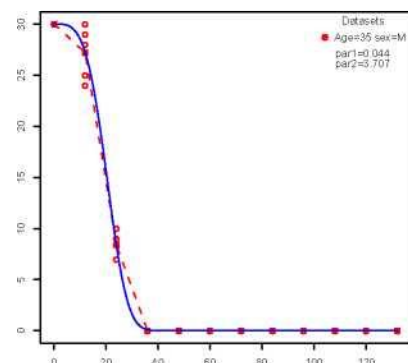

time, hours

time, hours

time, hours

Live curves. Stress=2

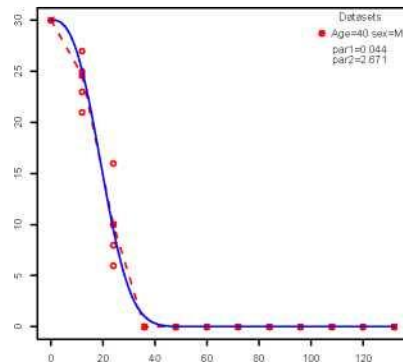

Live curves. Stress=2

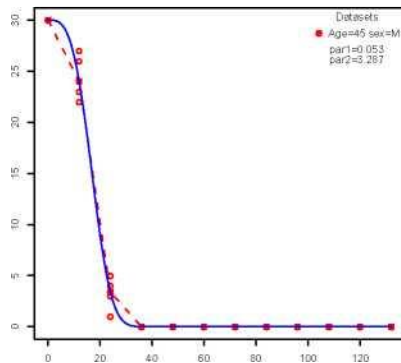

Live curves. Stress=2

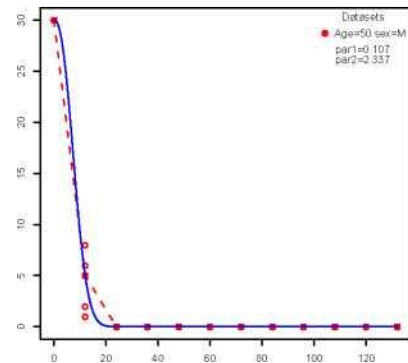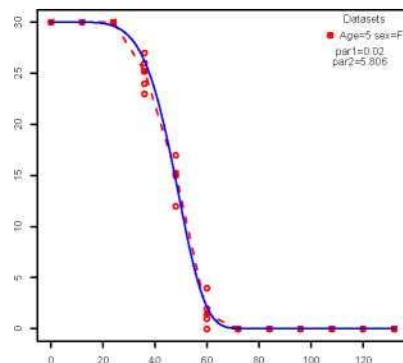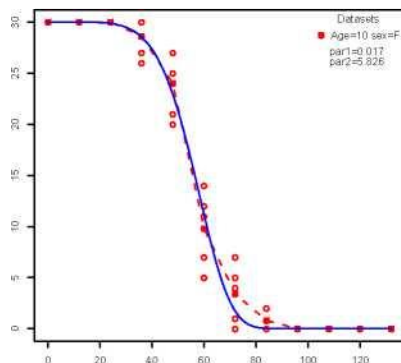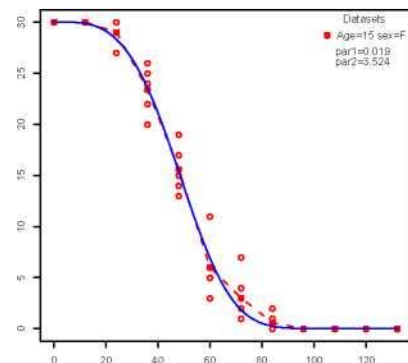

Live curves. Stress=2

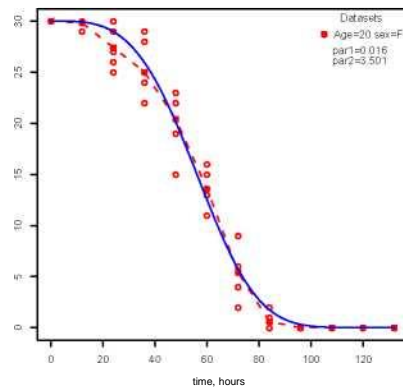

Live curves. Stress=2

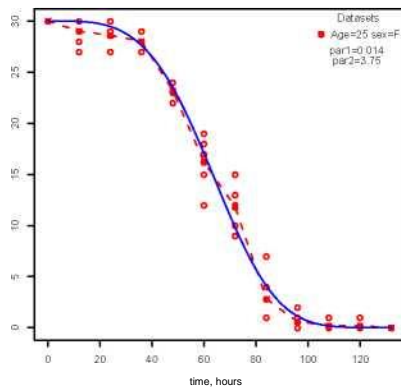

Live curves. Stress=2

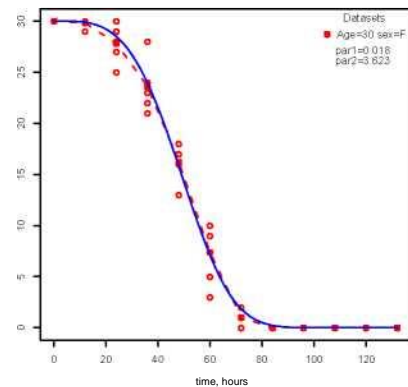

Live curves. Stress=2

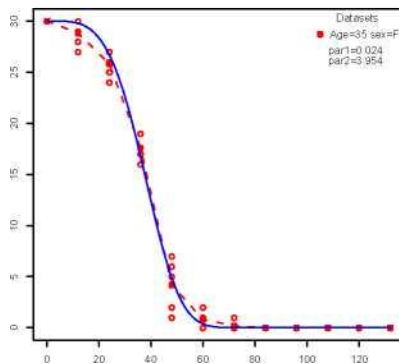

Live curves. Stress=2

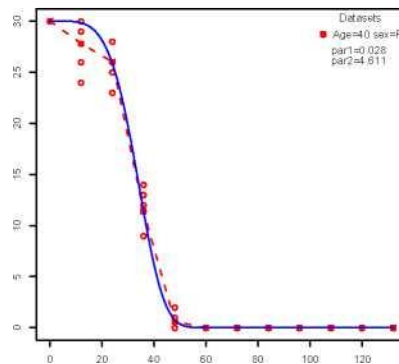

Live curves. Stress=2

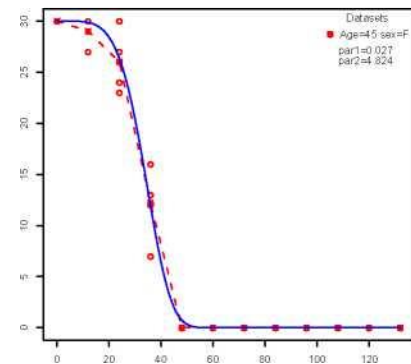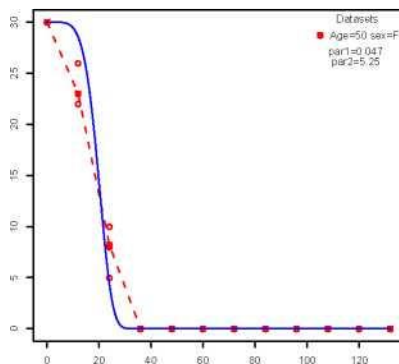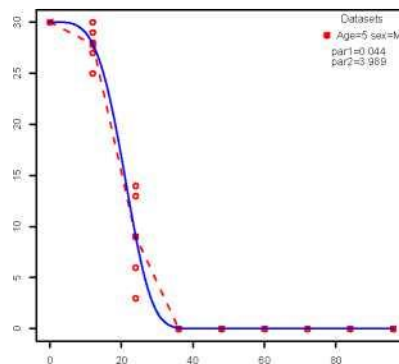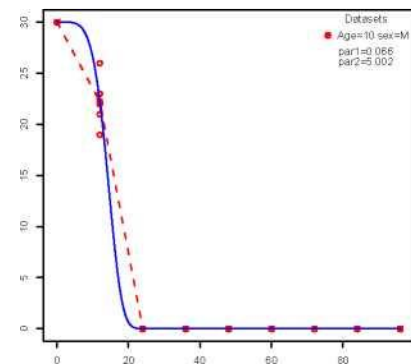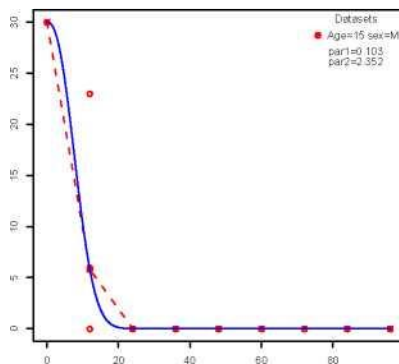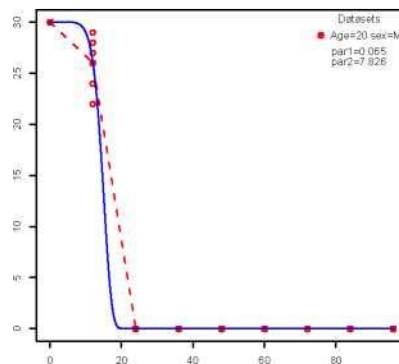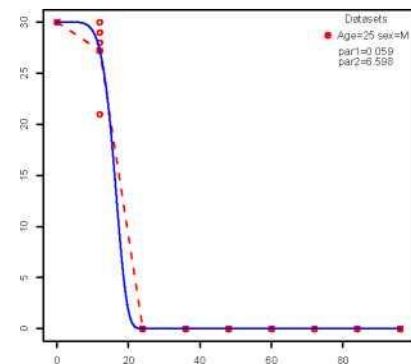

time, hours

time, hours

time, hours

Live curves. Stress=3

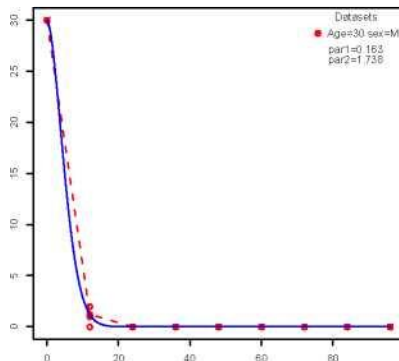

Live curves. Stress=3

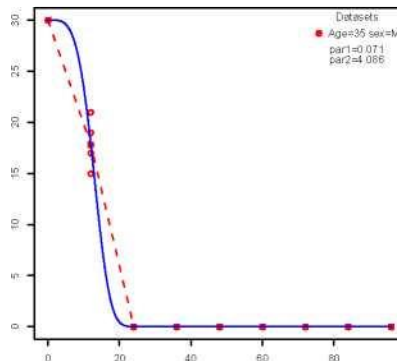

Live curves. Stress=3

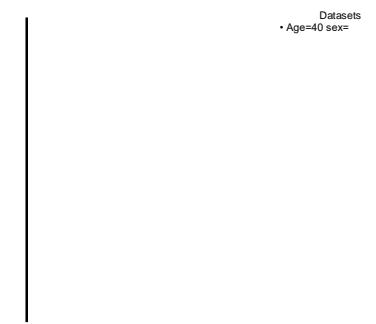

Live curves. Stress=3

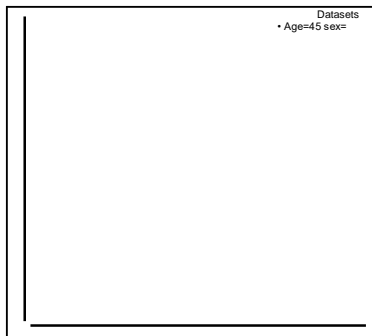

Live curves. Stress=3

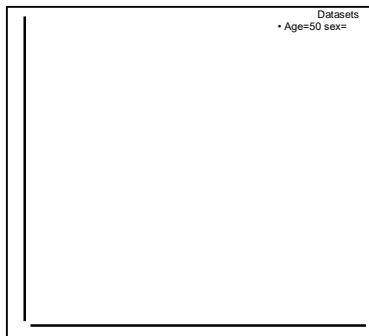

Live curves. Stress=3

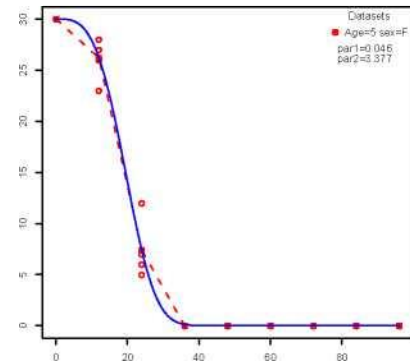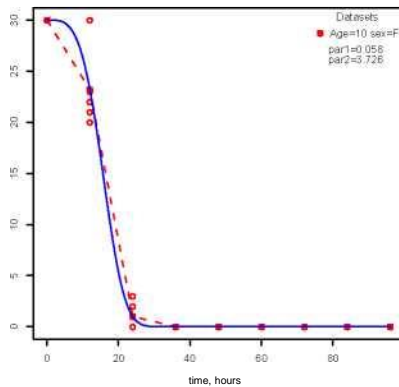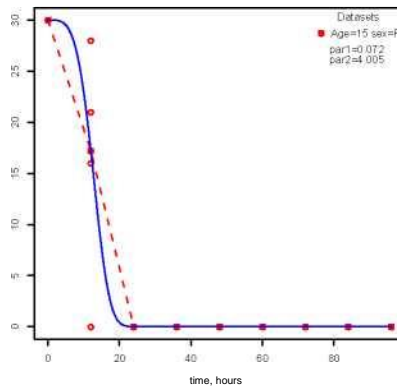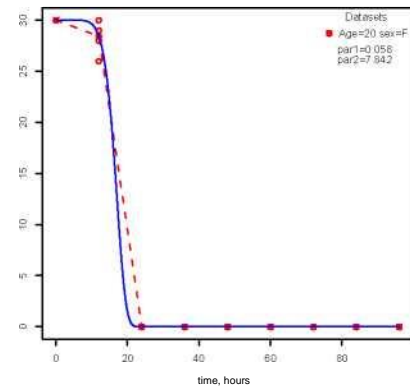

Live curves. Stress=3

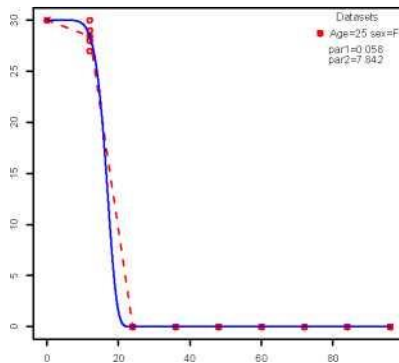

Live curves. Stress=3

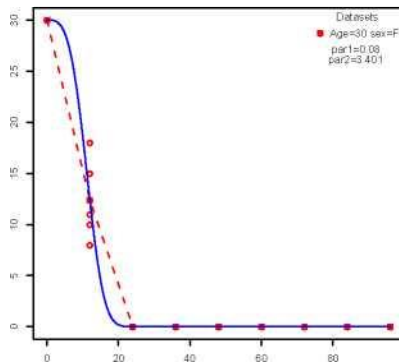

Live curves. Stress=3

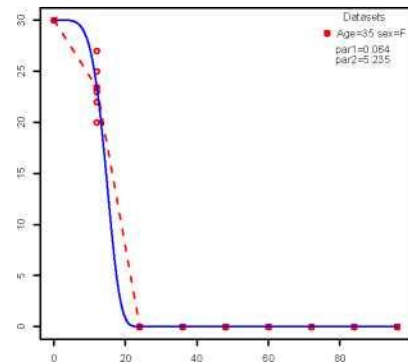

Live curves. Stress=3

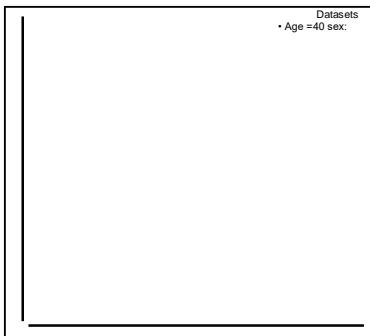

Live curves. Stress=3

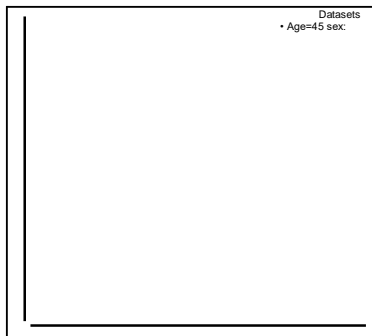

Live curves. Stress=3

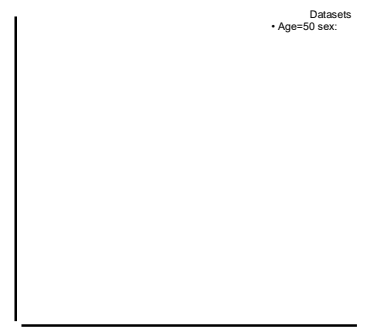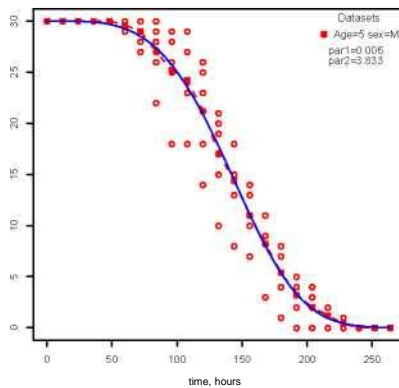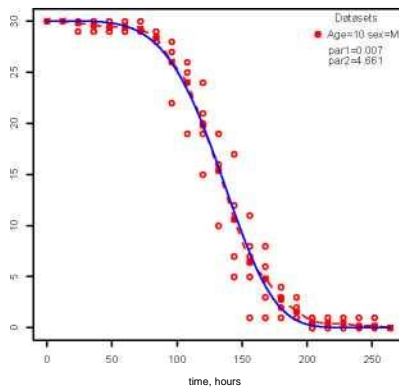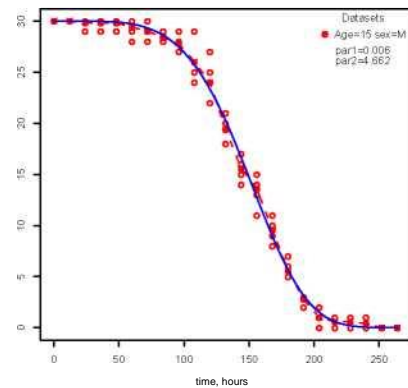



Live curves. Stress=4

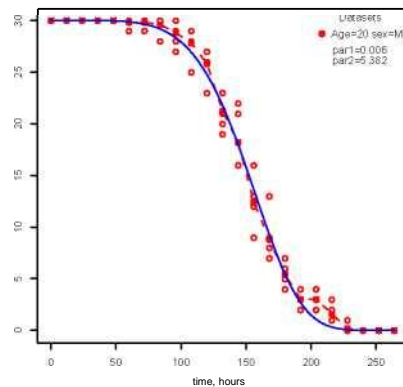

Live curves. Stress=4

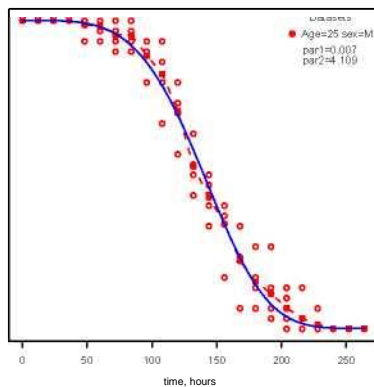

Live curves. Stress=4

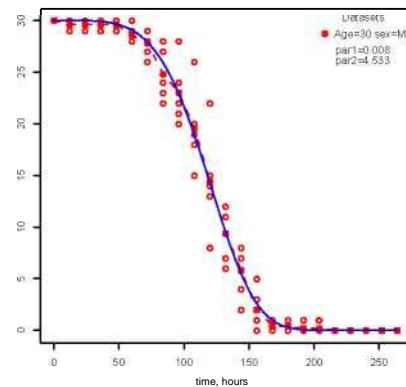

Live curves. Stress=4

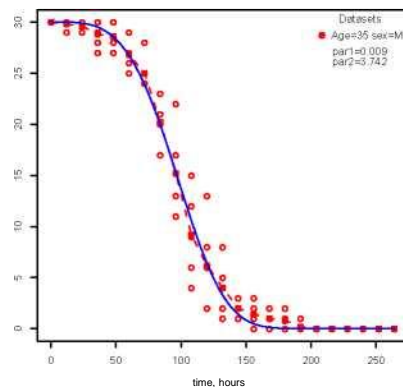

Live curves. Stress=4

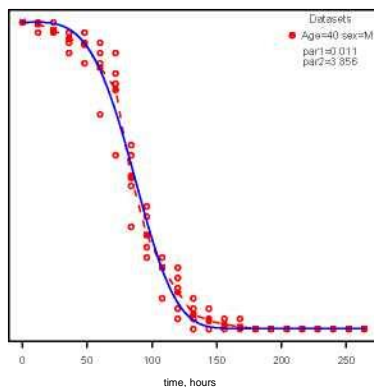

Live curves. Stress=4

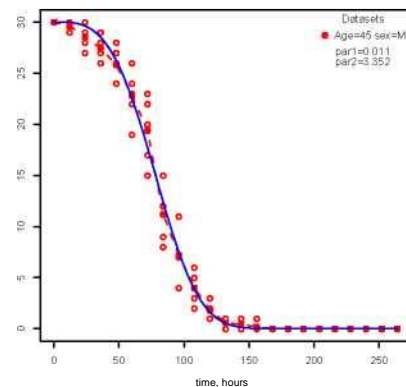

Live curves. Stress=4

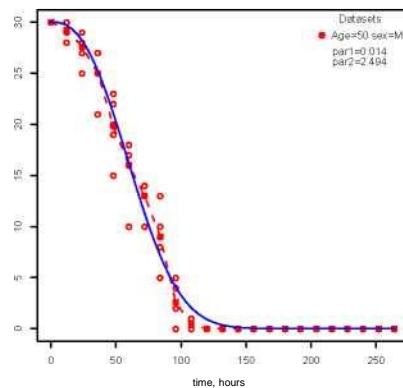

Live curves. Stress=4

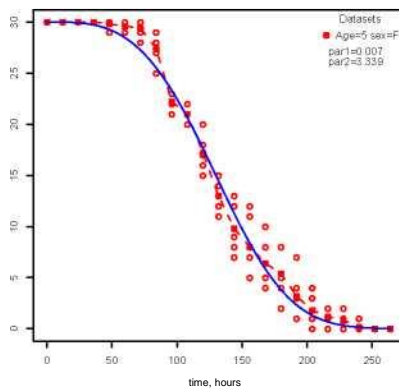

Live curves. Stress=4

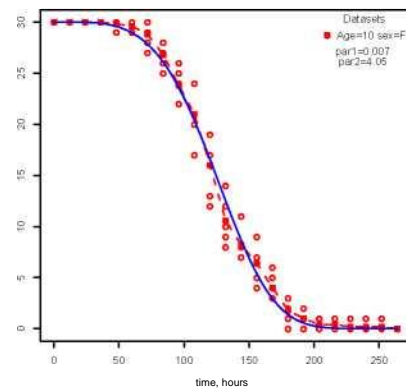

Live curves. Stress=4

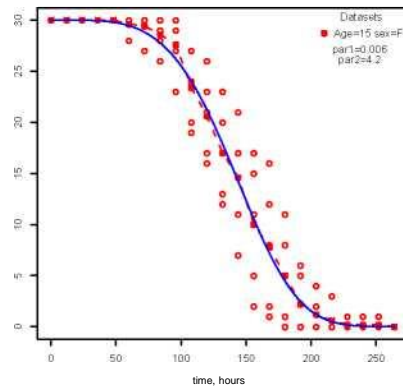

Live curves. Stress=4

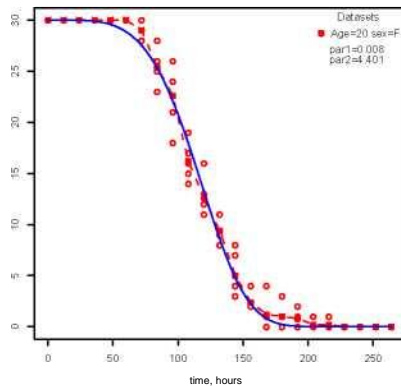

Live curves. Stress=4

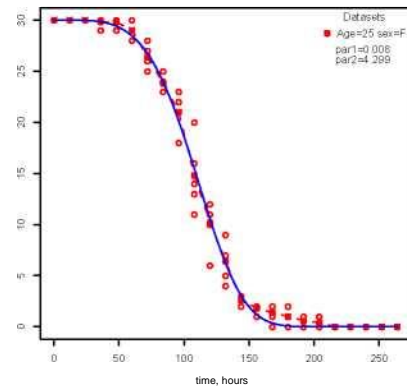

Live curves. Stress=4

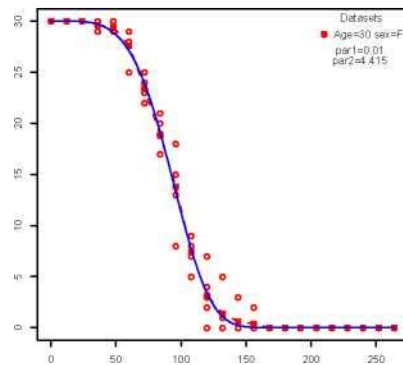

Live curves. Stress=4

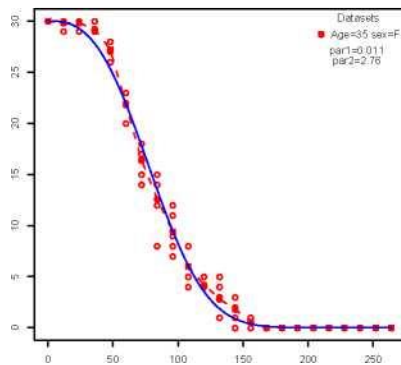

Live curves. Stress=4

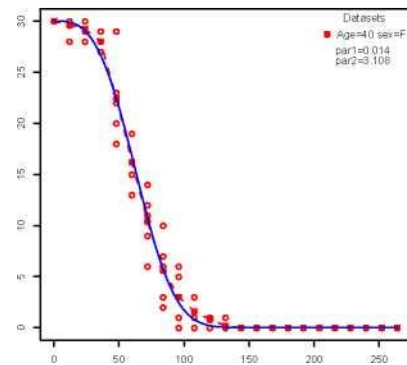

Live curves. Stress=4

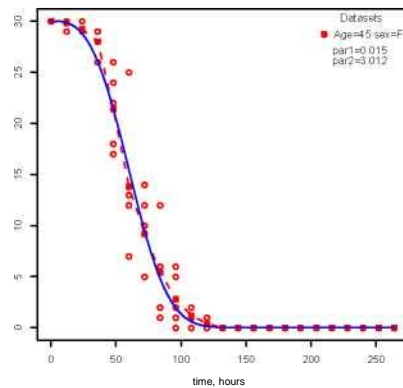

Live curves. Stress=4

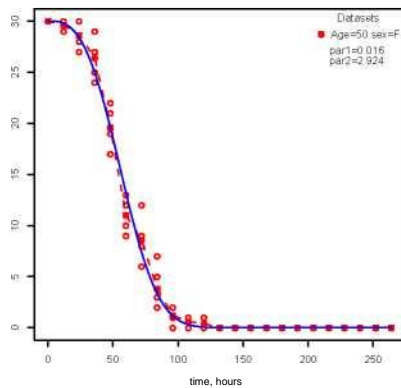

Live curves. Stress=5

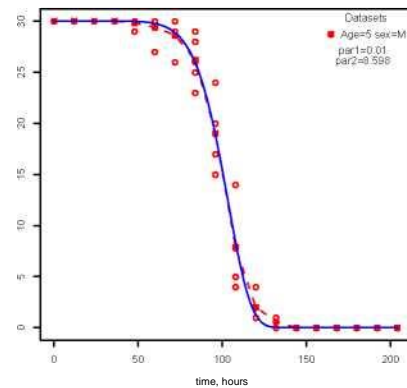

Live curves. Stress=5

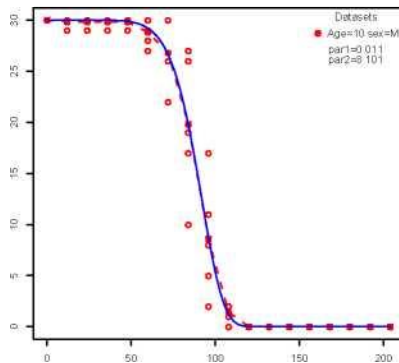

Live curves. Stress=5

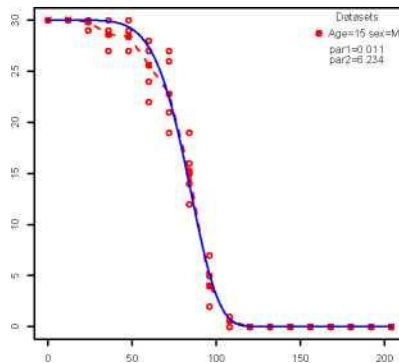

Live curves. Stress=5

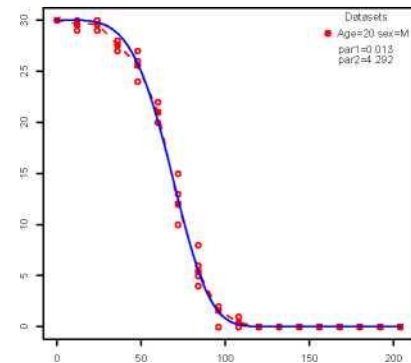

Live curves. Stress=5

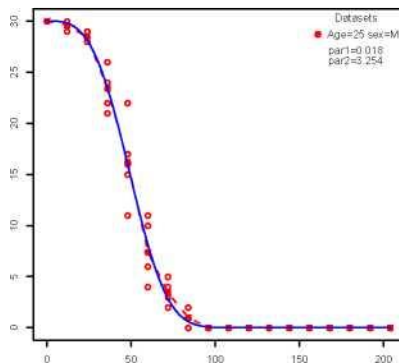

Live curves. Stress=5

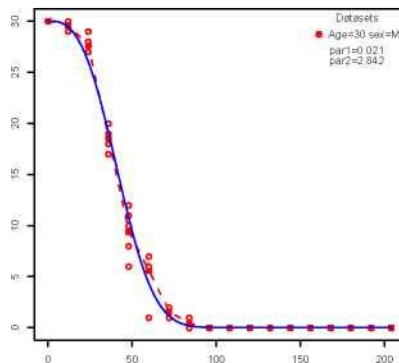

Live curves. Stress=5

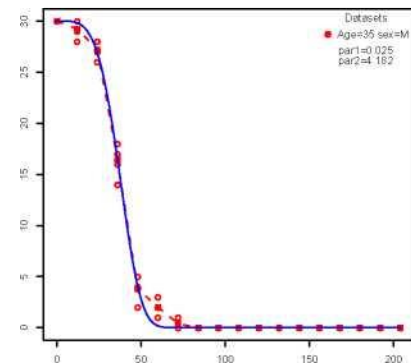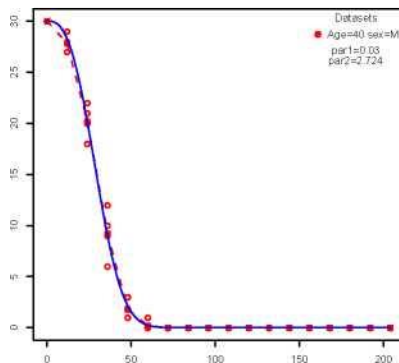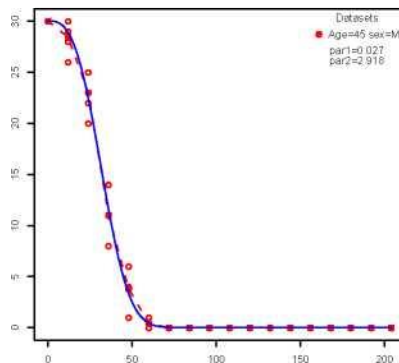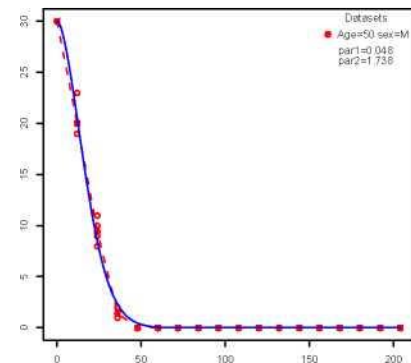

time, hours

time, hours

time, hours

Live curves. Stress=5

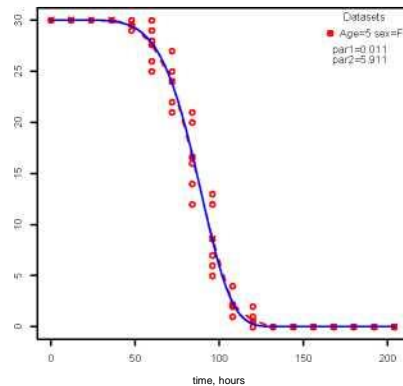

Live curves. Stress=5

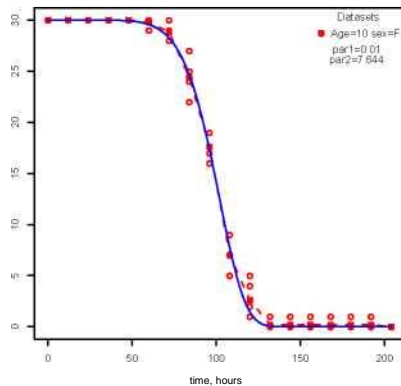

Live curves. Stress=5

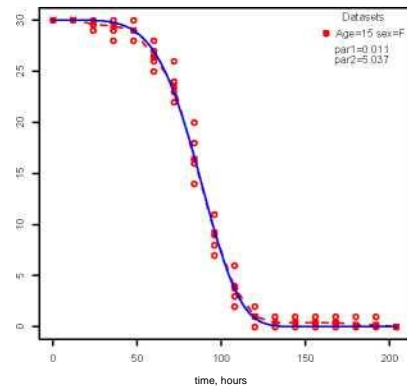

Live curves. Stress=5

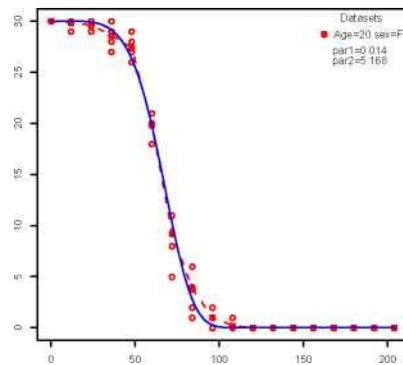

Live curves. Stress=5

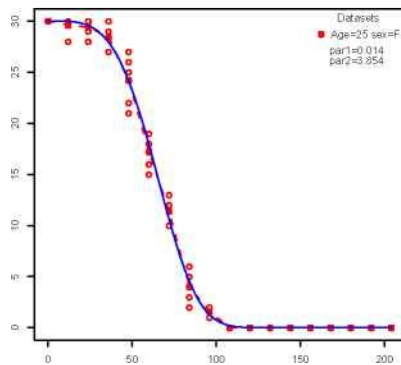

Live curves. Stress=5

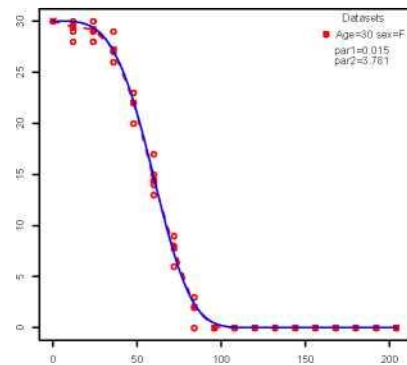

Live curves. Stress=5

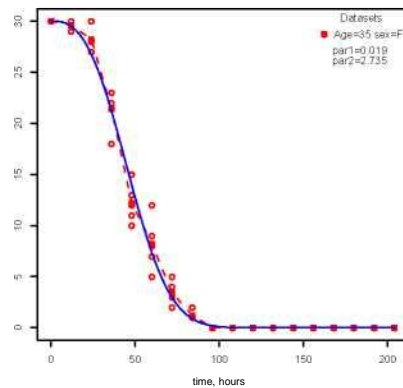

Live curves. Stress=5

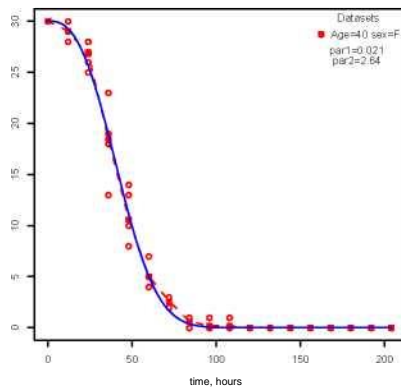

Live curves. Stress=5

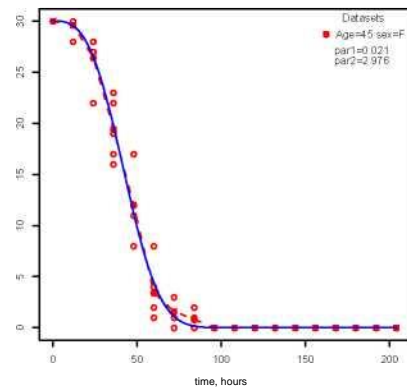

Live curves. Stress=5

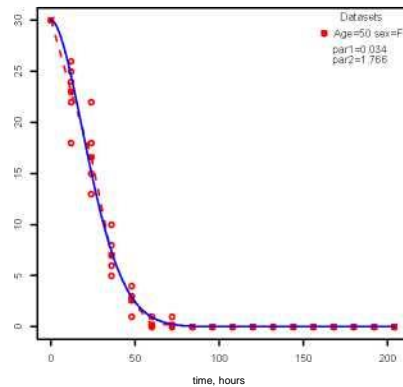

Live curves. Stress=6

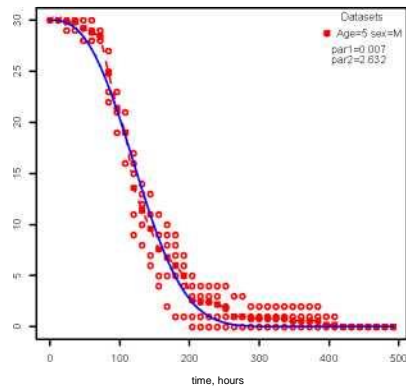

Live curves. Stress=6

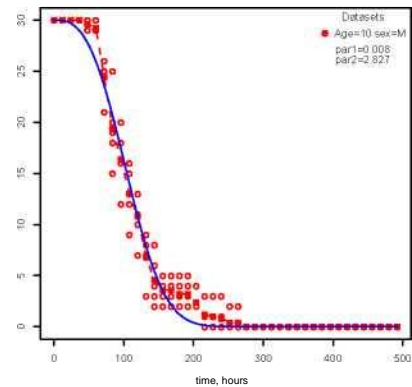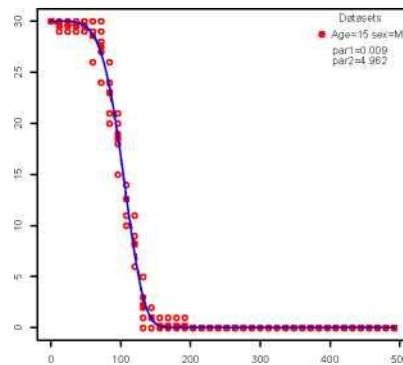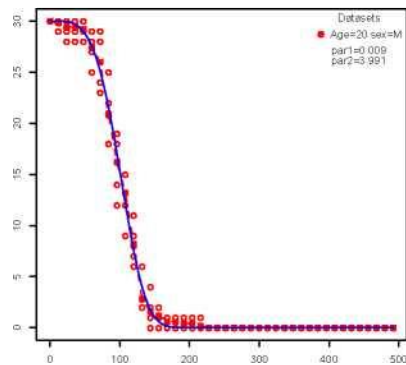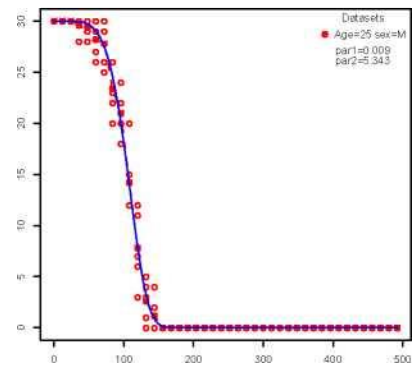

Live curves. Stress=6

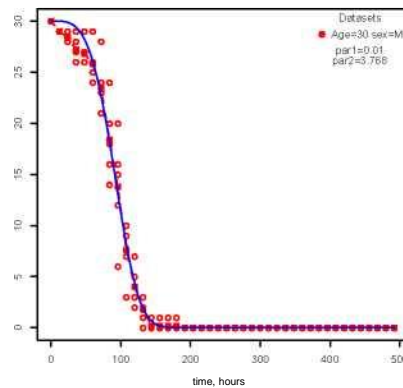

Live curves. Stress=6

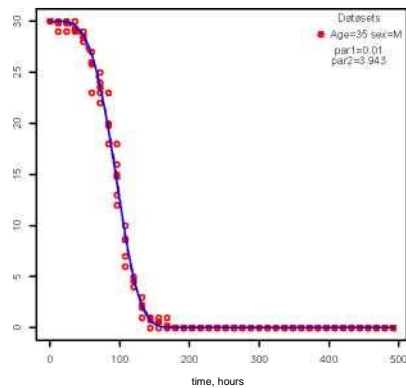

Live curves. Stress=6

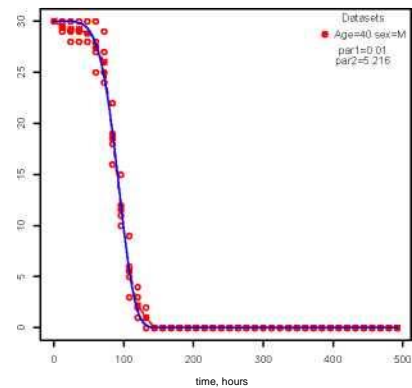

Live curves. Stress=6

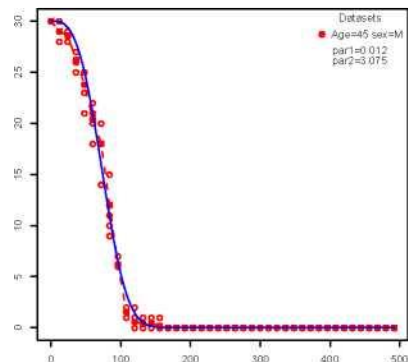

Live curves. Stress=6

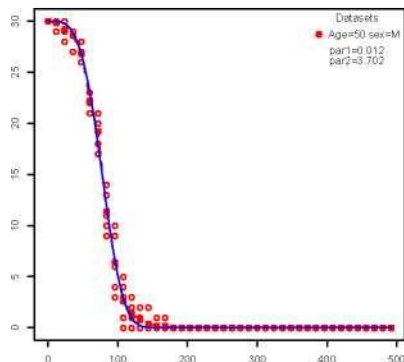

Live curves. Stress=6

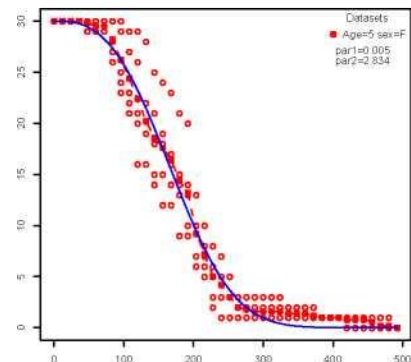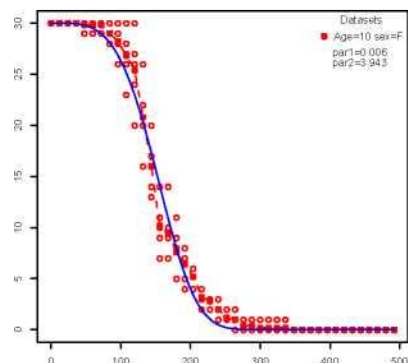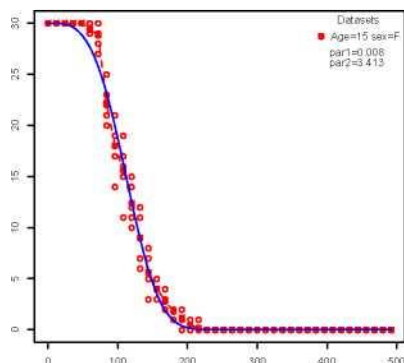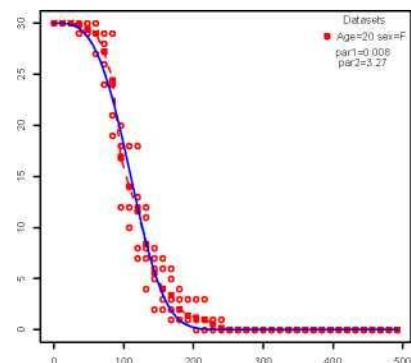

Live curves. Stress=6

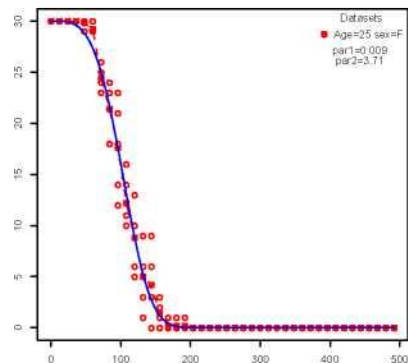

Live curves. Stress=6

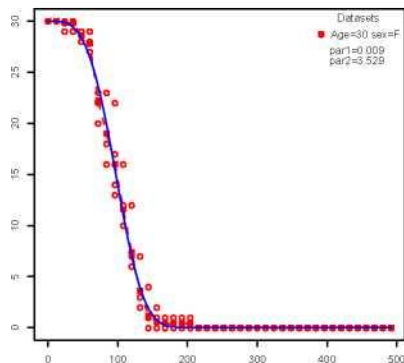

Live curves. Stress=6

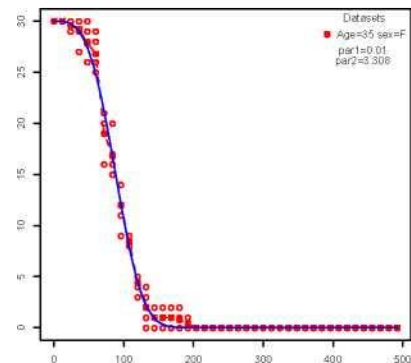

time, hours

time, hours

time, hours

Live curves. Stress=6

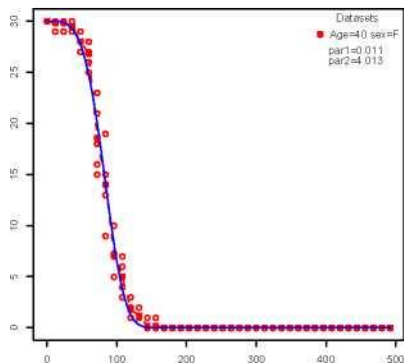

Live curves. Stress=6

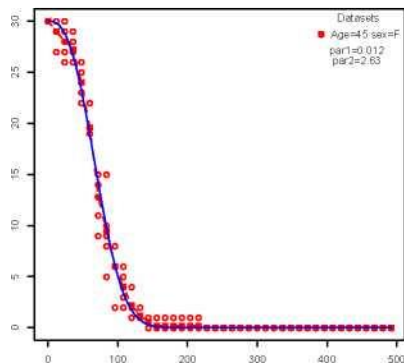

Live curves. Stress=6

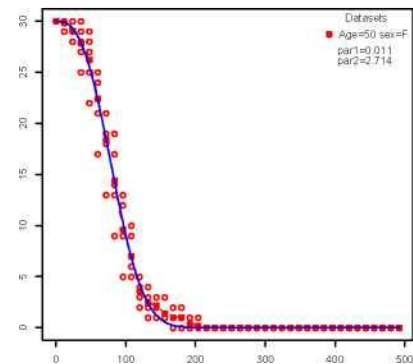

Live curves. Stress=7

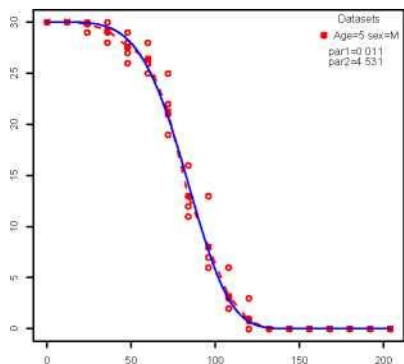

Live curves. Stress=7

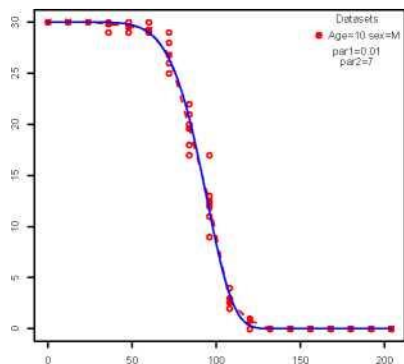

Live curves. Stress=7

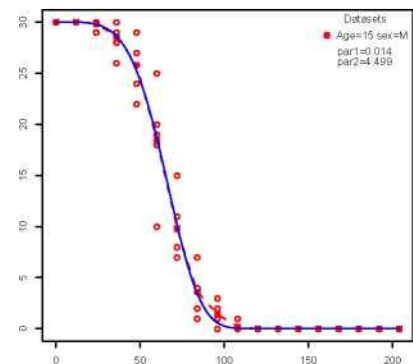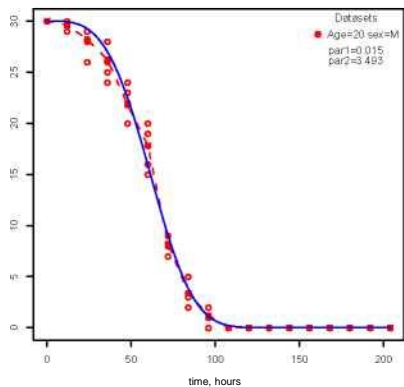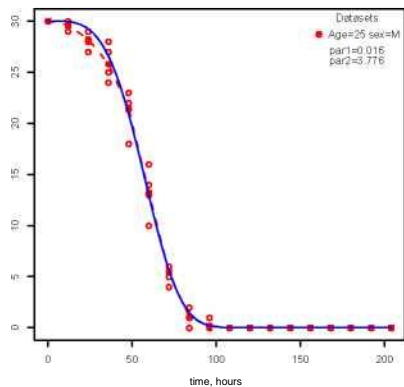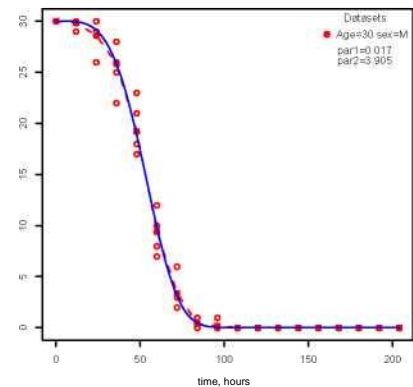

Live curves. Stress=7

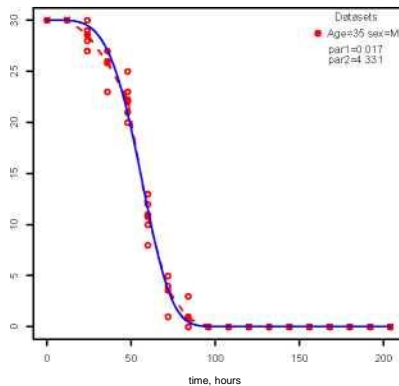

Live curves. Stress=7

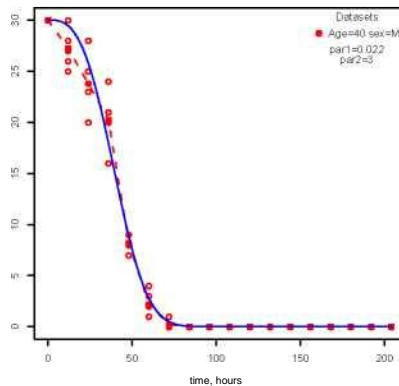

Live curves. Stress=7

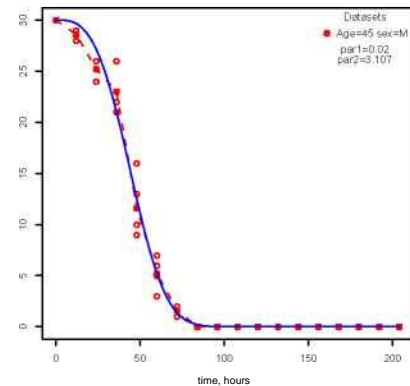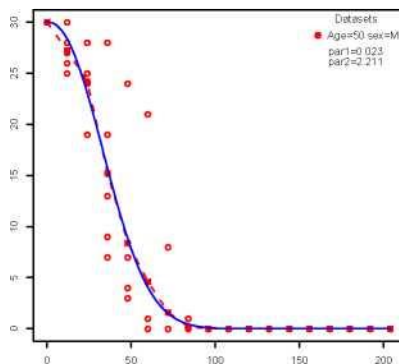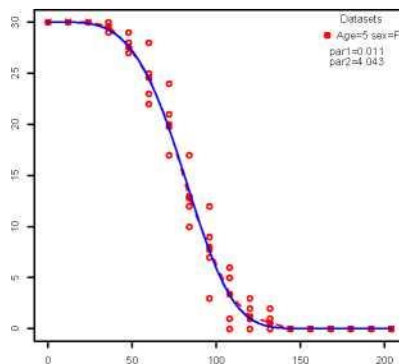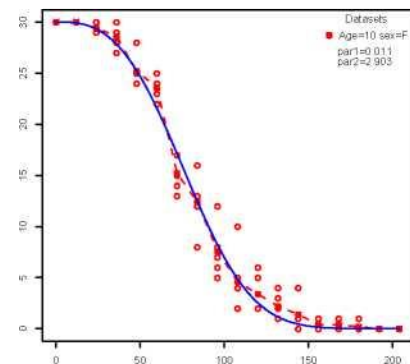

Live curves. Stress=7

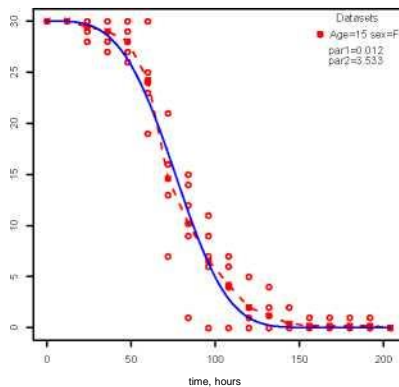

Live curves. Stress=7

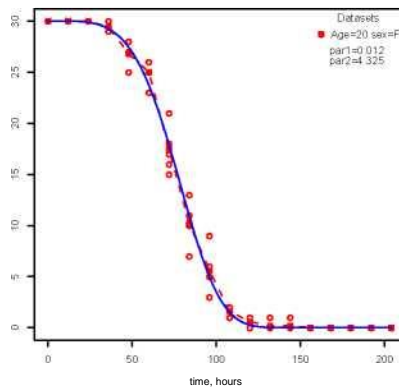

Live curves. Stress=7

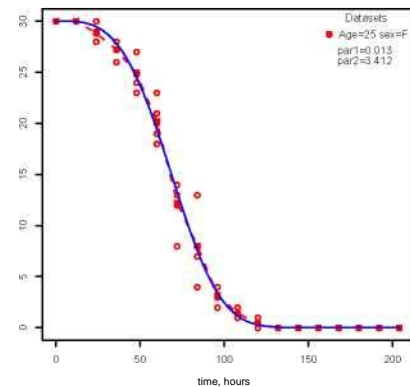



Live curves. Stress=7

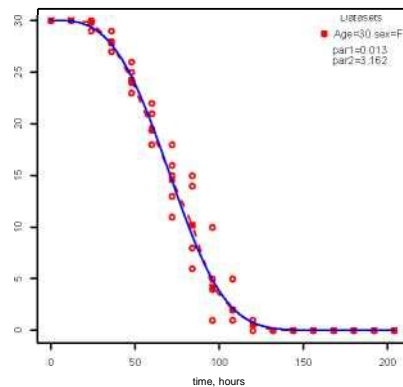

Live curves. Stress=7

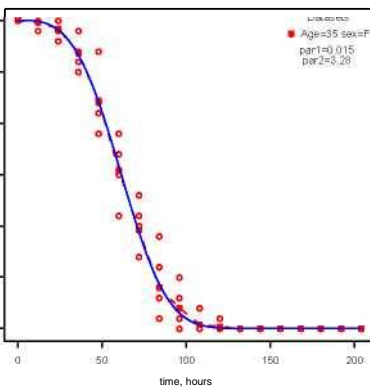

Live curves. Stress=7

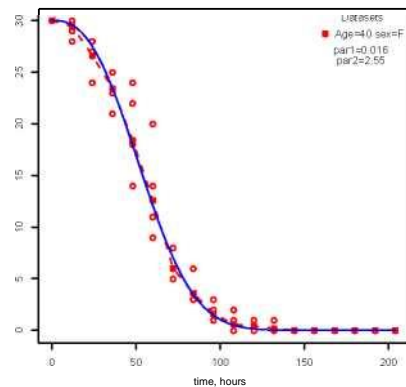

Live curves. Stress=7

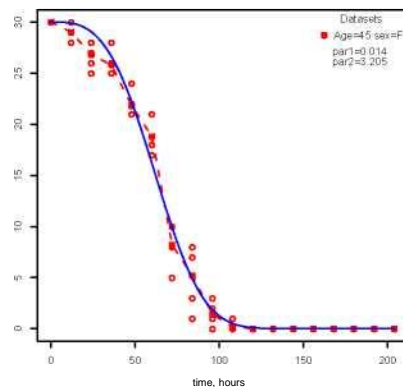

Live curves. Stress=7

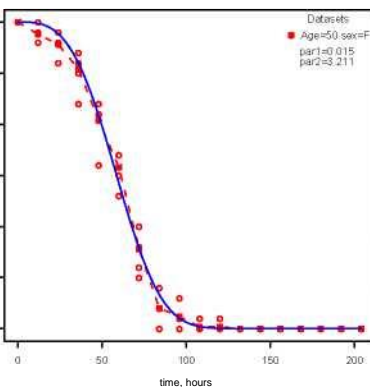

Live curves. Stress=8

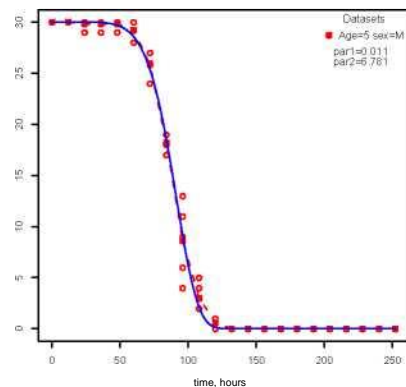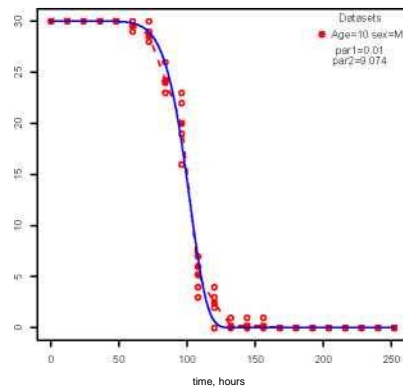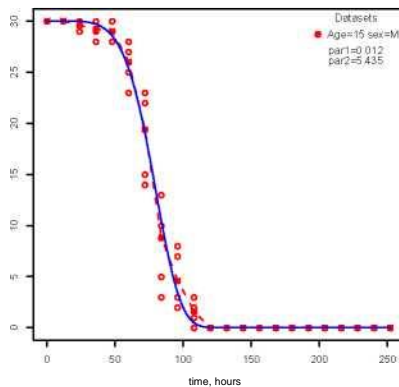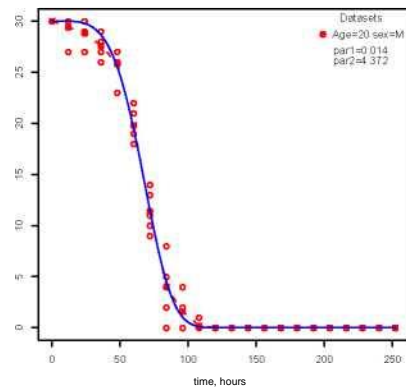

Live curves. Stress=8

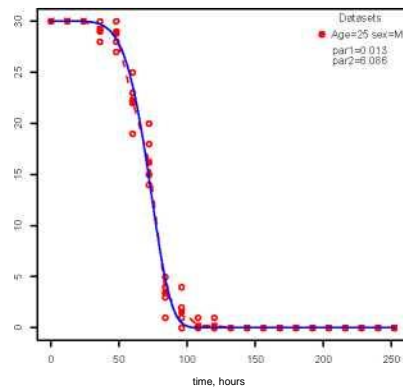

Live curves. Stress=8

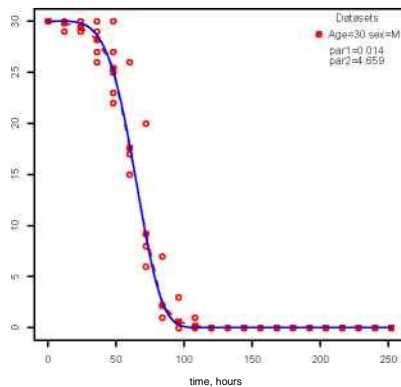

Live curves. Stress=8

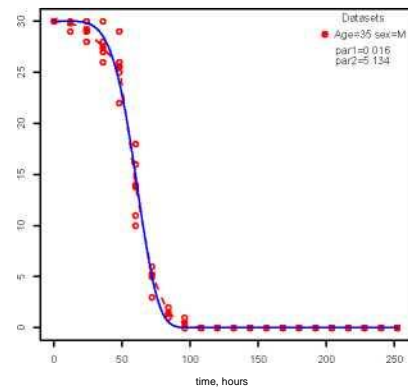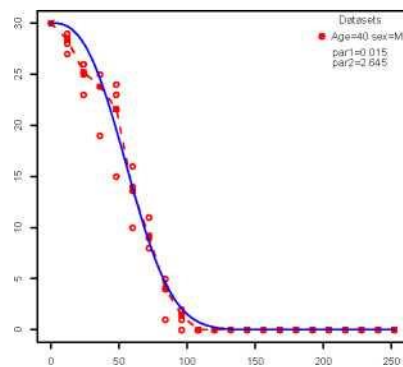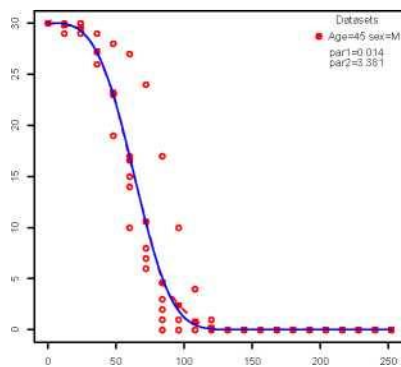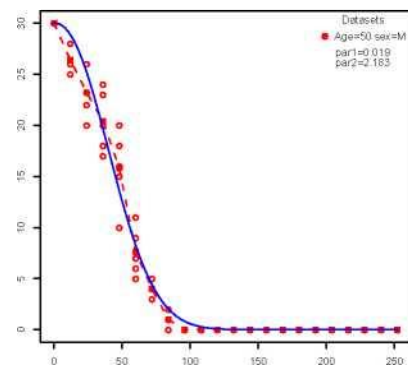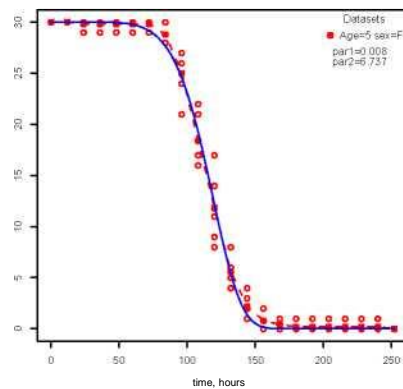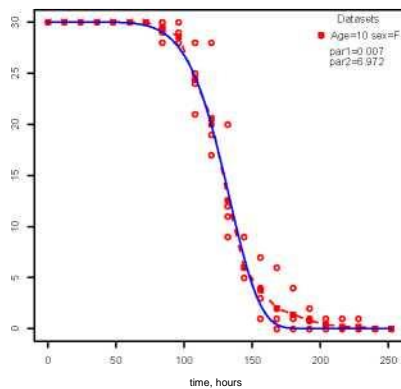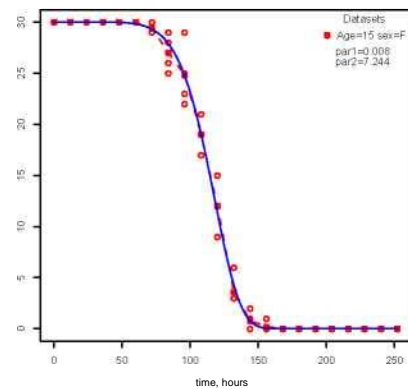

Live curves. Stress=8

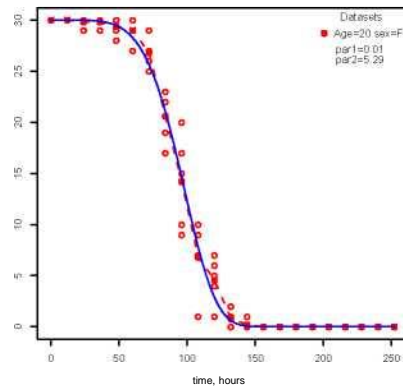

Live curves. Stress=8

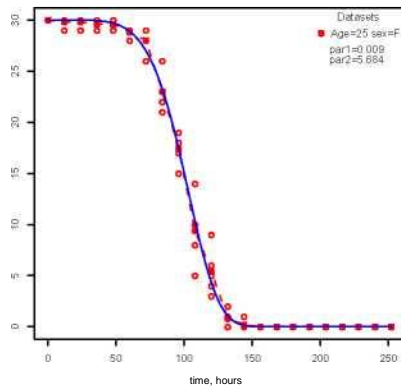

Live curves. Stress=8

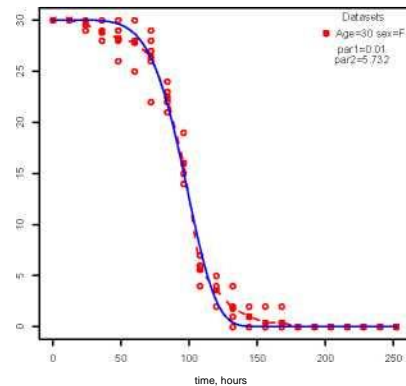

Live curves. Stress=8

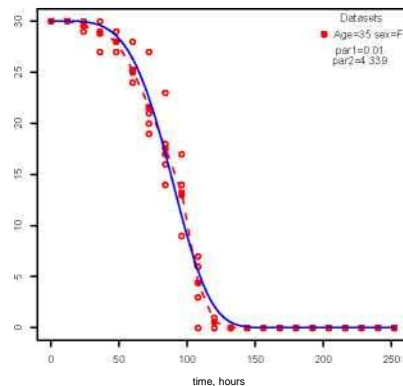

Live curves. Stress=8

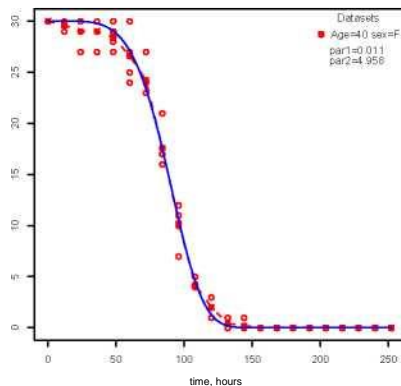

Live curves. Stress=8

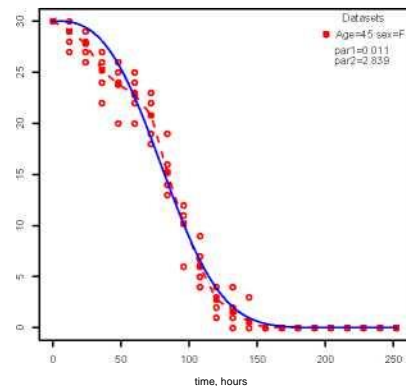

Live curves. Stress=8

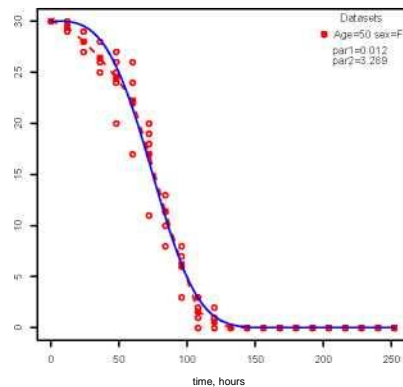

Live curves. Stress=9

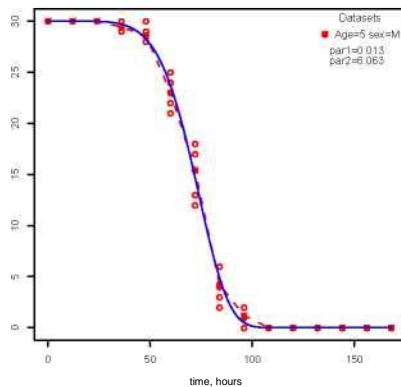

Live curves. Stress=9

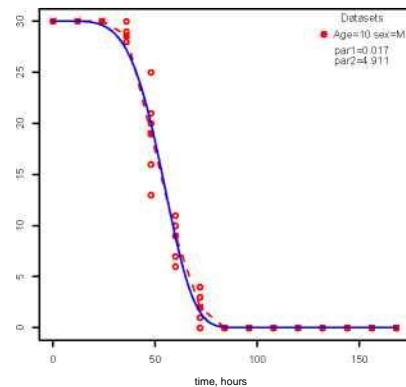

Live curves. Stress=9

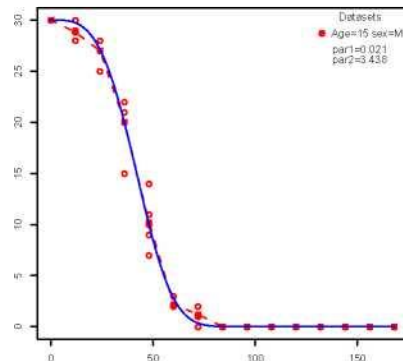

Live curves. Stress=9

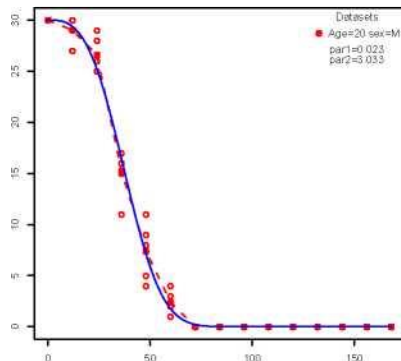

Live curves. Stress=9

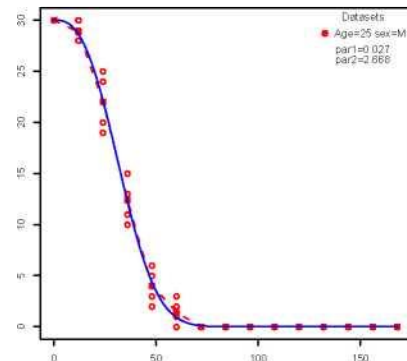

Live curves. Stress=9

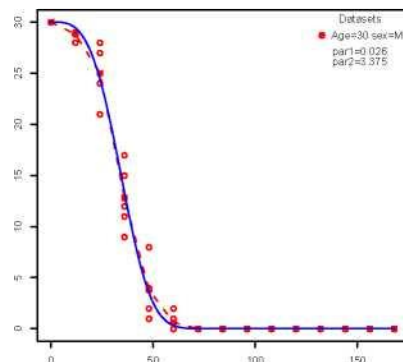

Live curves. Stress=9

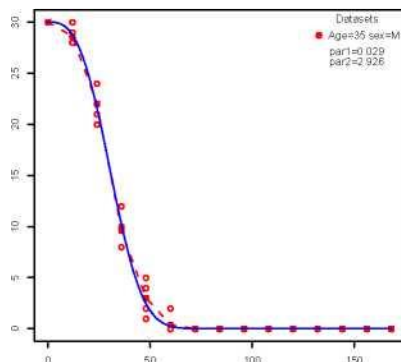

Live curves. Stress=9

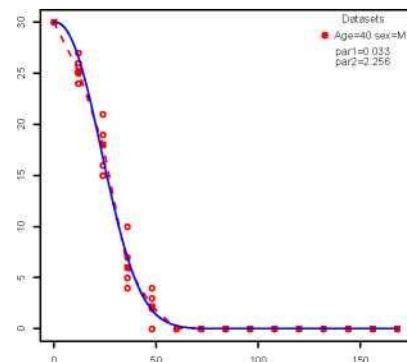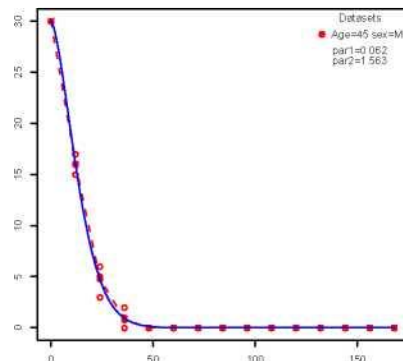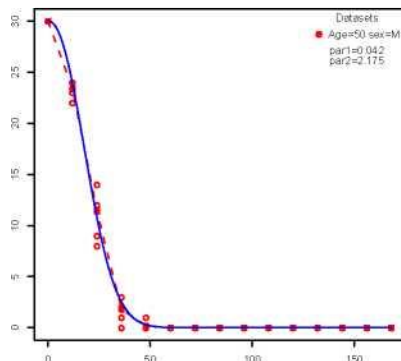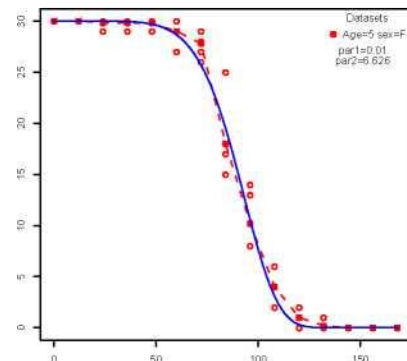

time, hours

time, hours

time, hours

Live curves. Stress=9

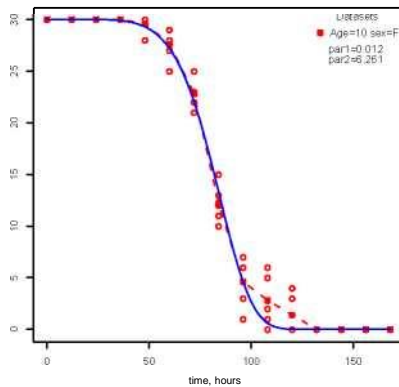

Live curves. Stress=9

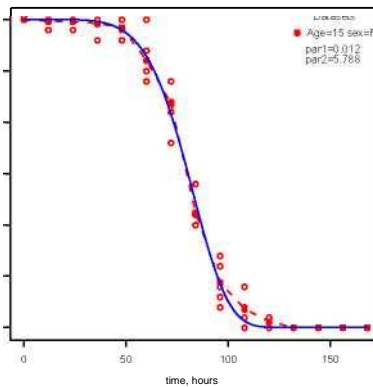

Live curves. Stress=9

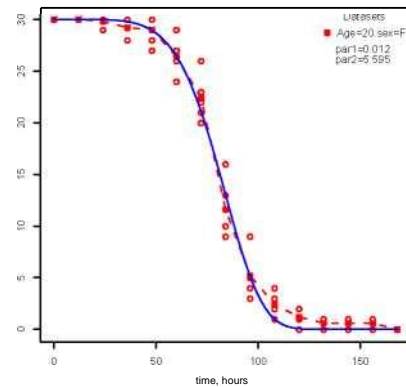

Live curves. Stress=9

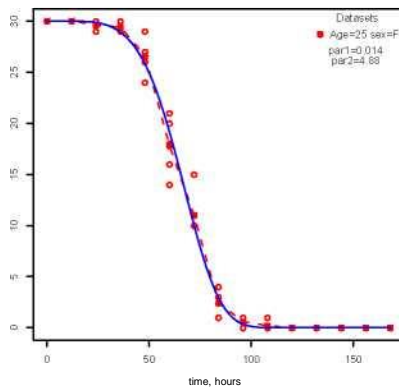

Live curves. Stress=9

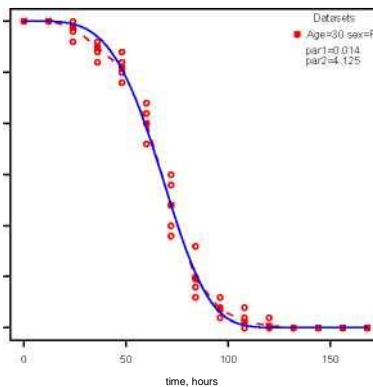

Live curves. Stress=9

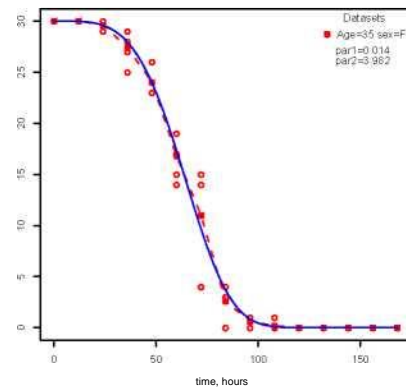

Live curves. Stress=9

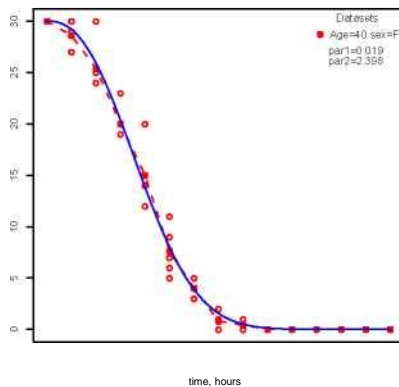

Live curves. Stress=9

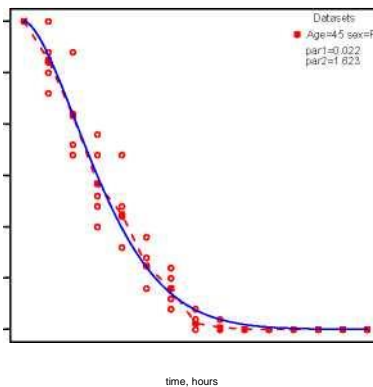

Live curves. Stress=9

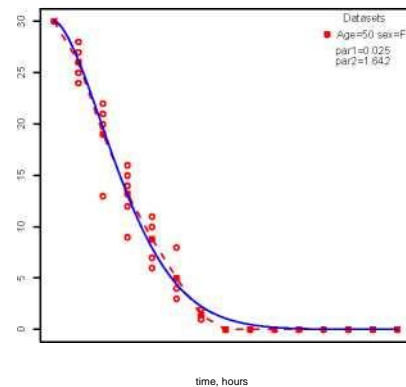

Live curves. Stress=10

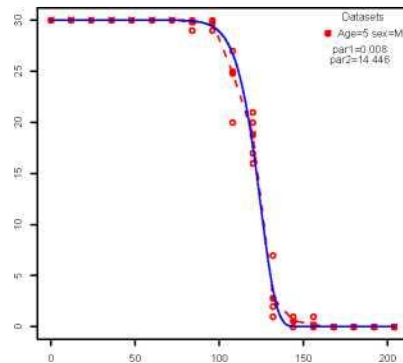

Live curves. Stress=10

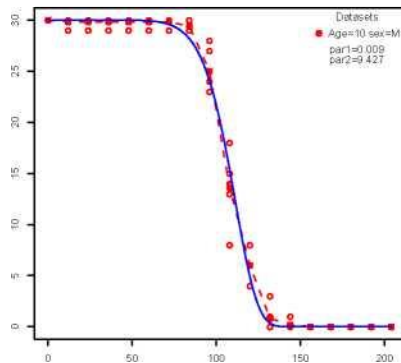

Live curves. Stress=10

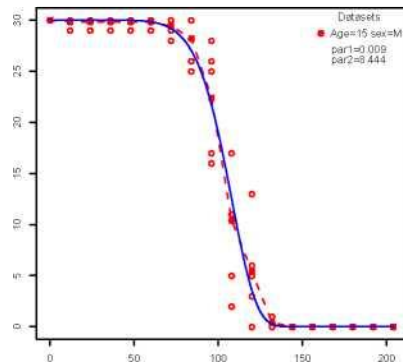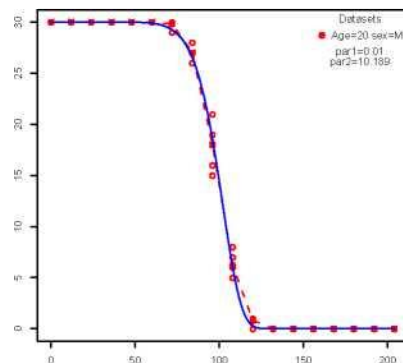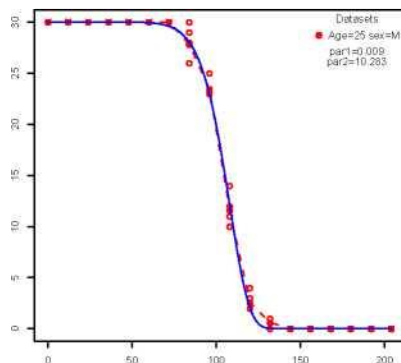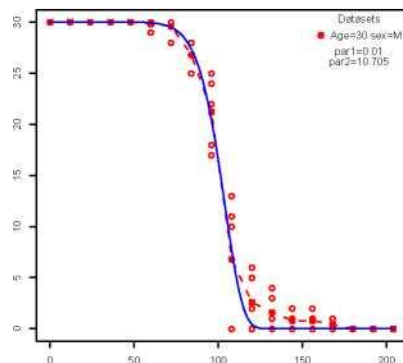

Live curves. Stress=10

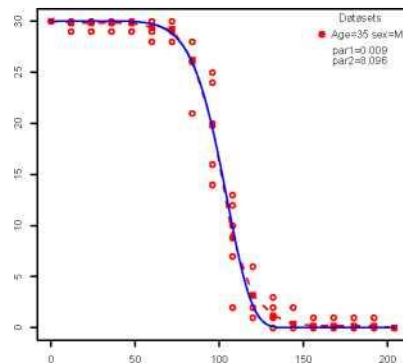

Live curves. Stress=10

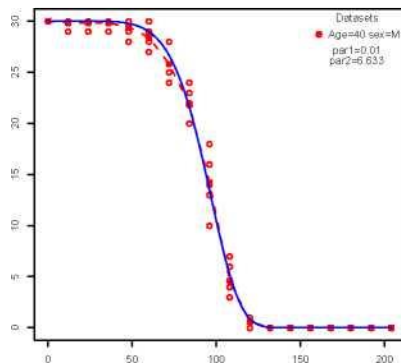

Live curves. Stress=10

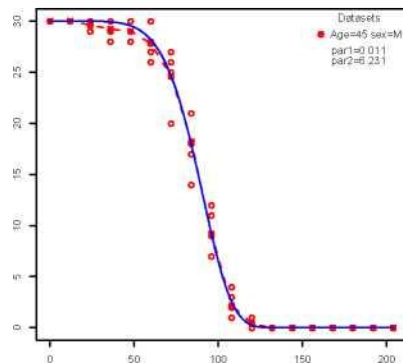

time, hours

time, hours

time, hours

Live curves. Stress=10

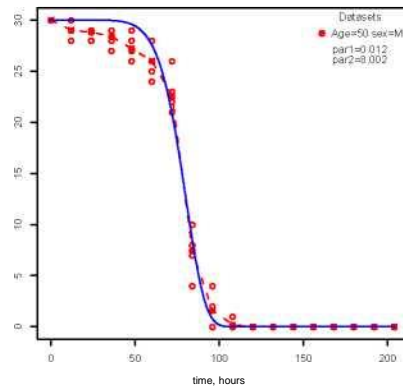

Live curves. Stress=10

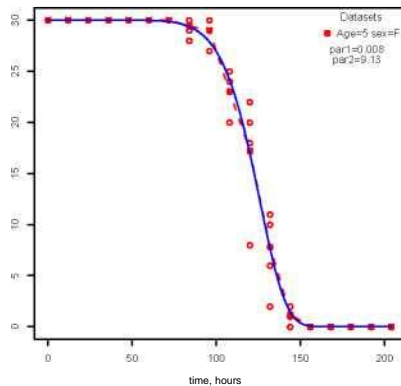

Live curves. Stress=10

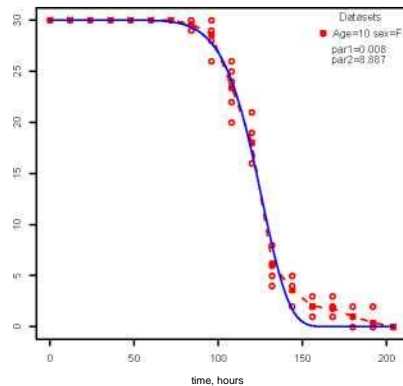

Live curves. Stress=10

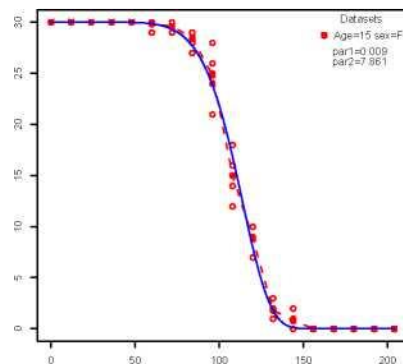

Live curves. Stress=10

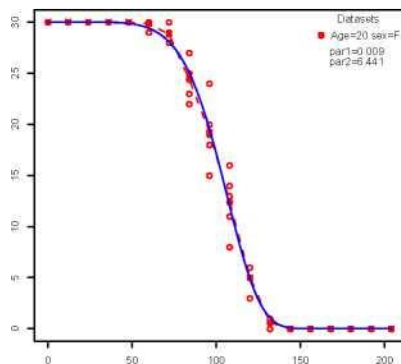

Live curves. Stress=10

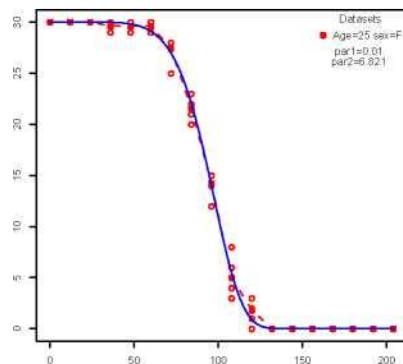

Live curves. Stress=10

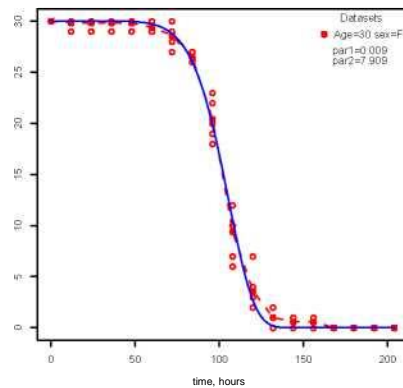

Live curves. Stress=10

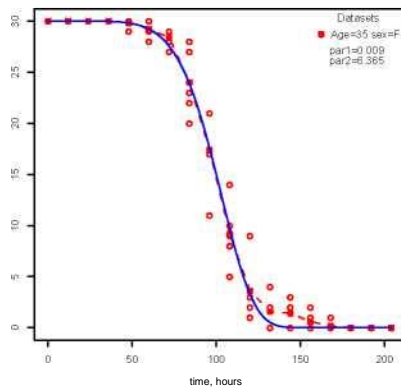

Live curves. Stress=10

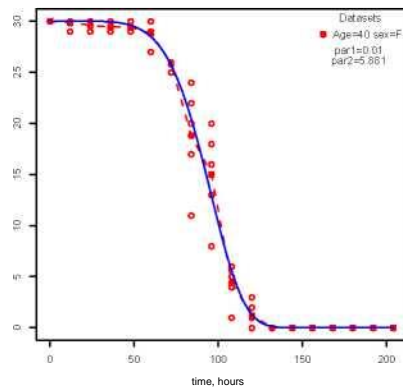

Live curves. Stress=10

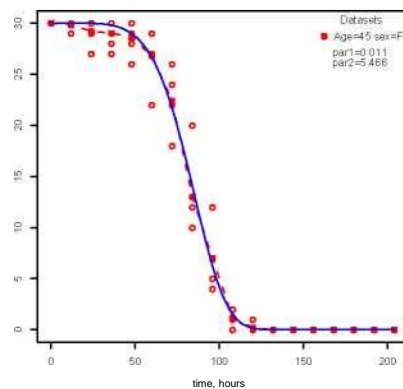

Live curves. Stress=10

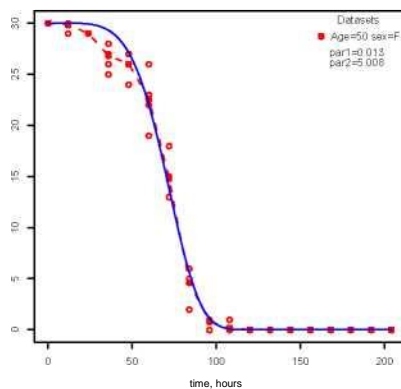

Live curves. Stress=11

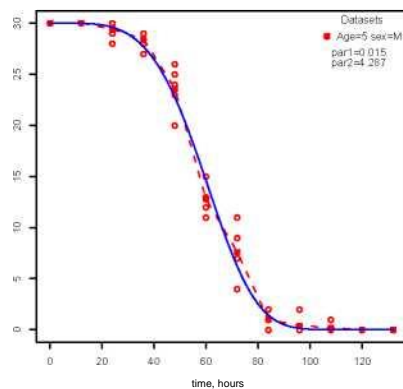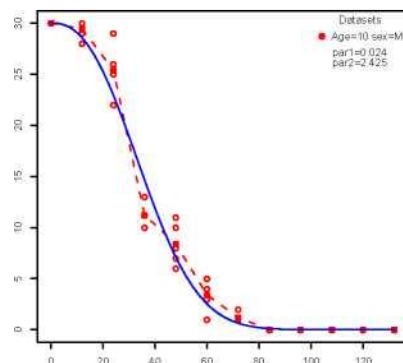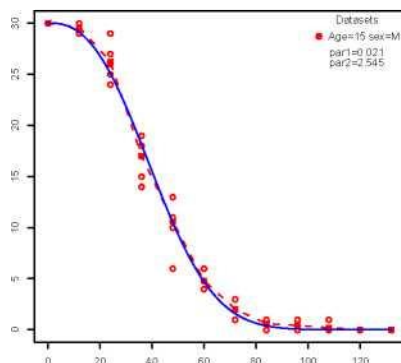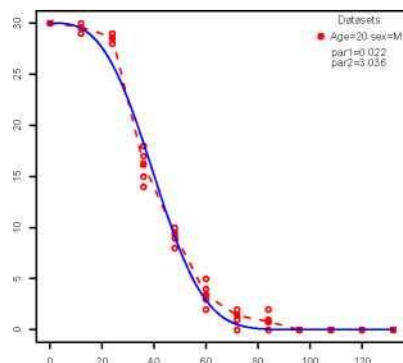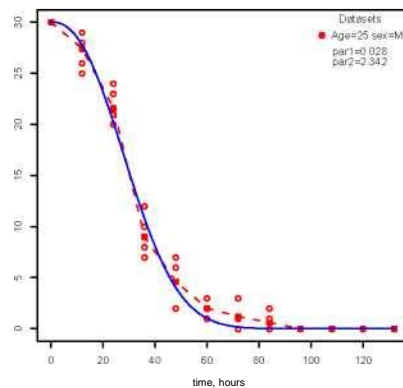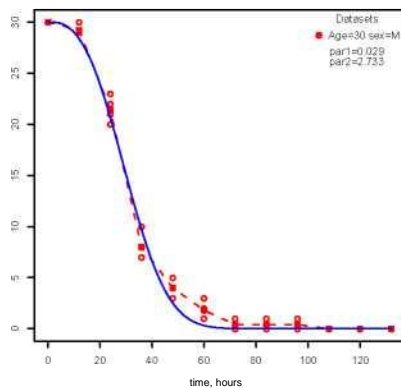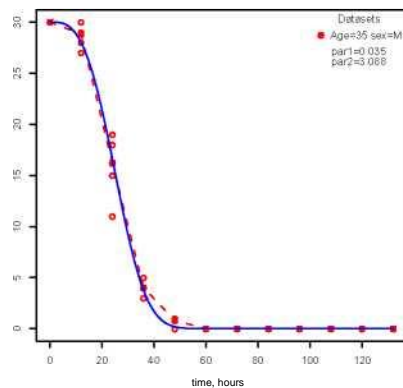



Live curves. Stress=11

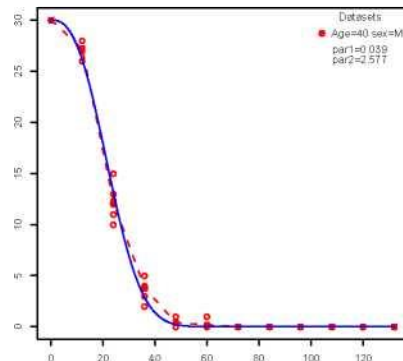

Live curves. Stress=11

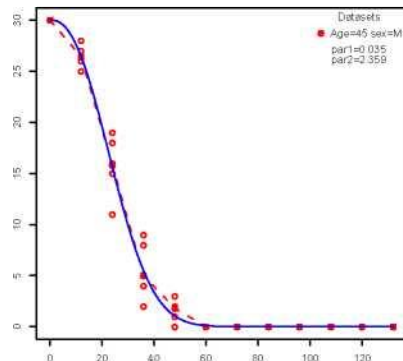

Live curves. Stress=11

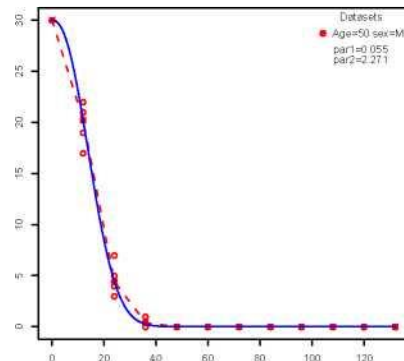

Live curves. Stress=11

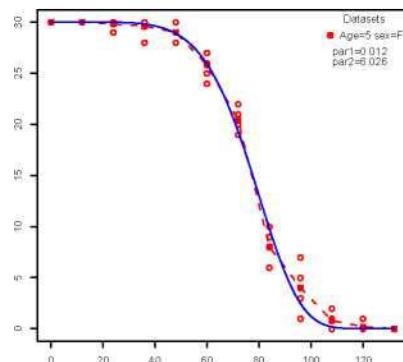

Live curves. Stress=11

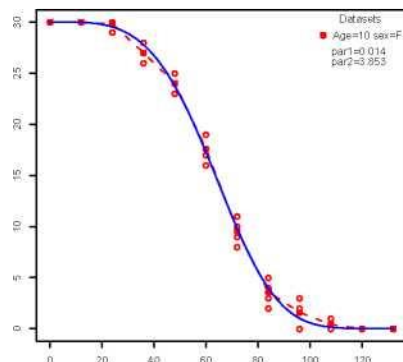

Live curves. Stress=11

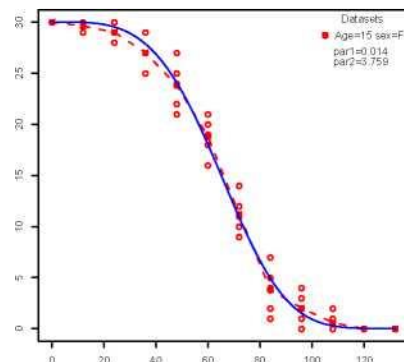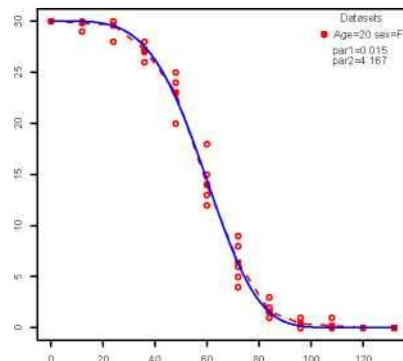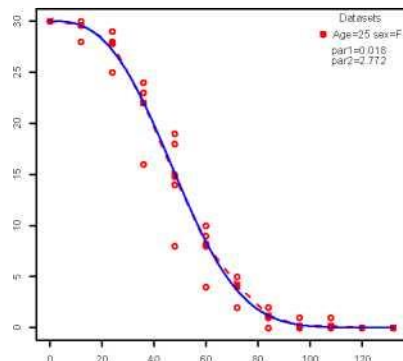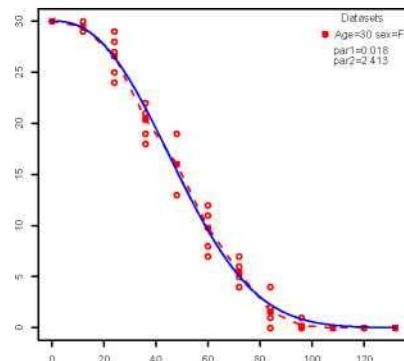

time, hours

time, hours

time, hours

Live curves. Stress=11

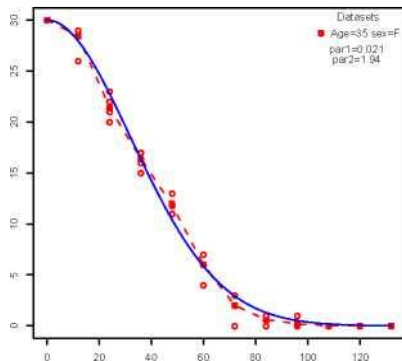

Live curves. Stress=11

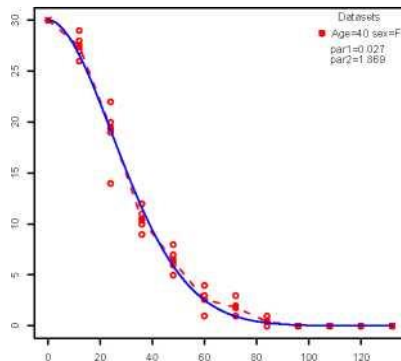

Live curves. Stress=11

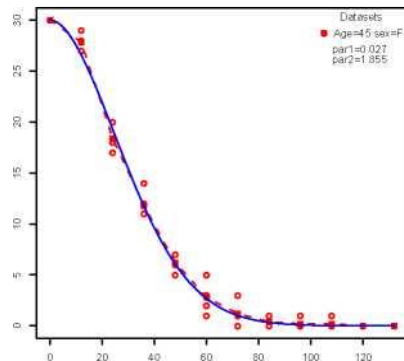

Live curves. Stress=11

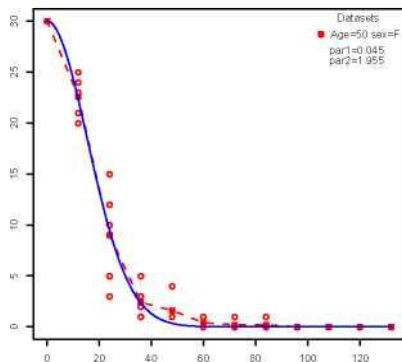

Live curves. Stress=12

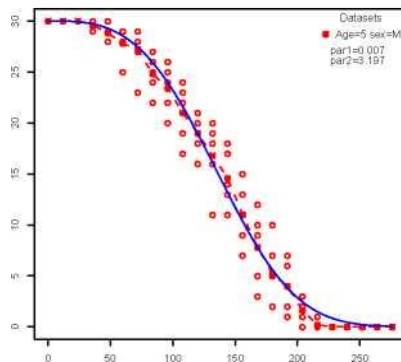

Live curves. Stress=12

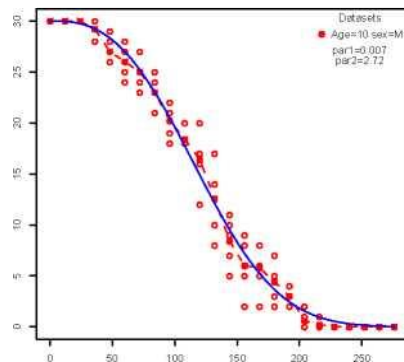

Live curves. Stress=12

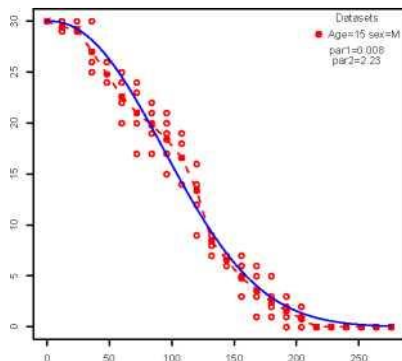

Live curves. Stress=12

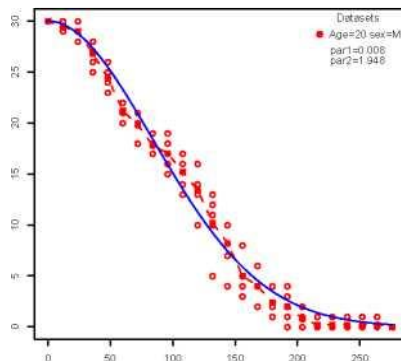

Live curves. Stress=12

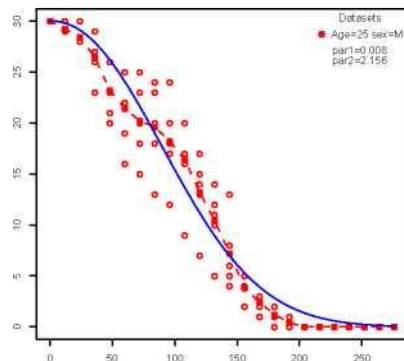

time, hours

time, hours

time, hours

Live curves. Stress=12

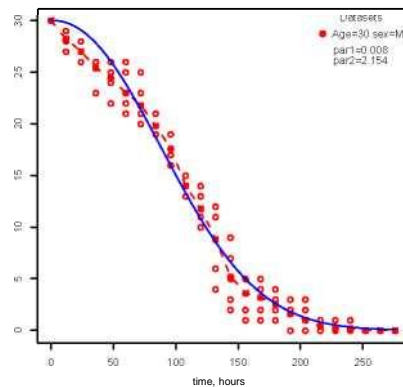

Live curves. Stress=12

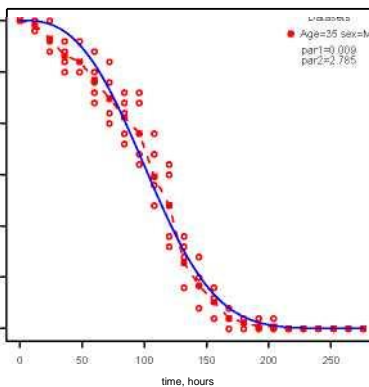

Live curves. Stress=12

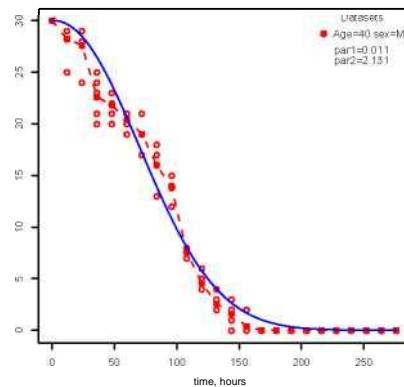

Live curves. Stress=12

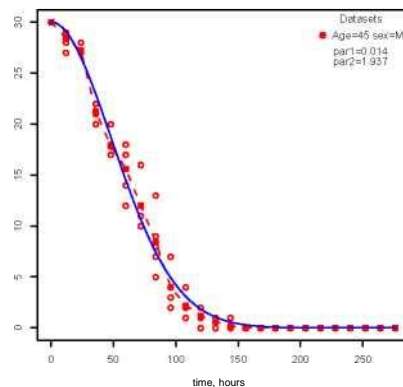

Live curves. Stress=12

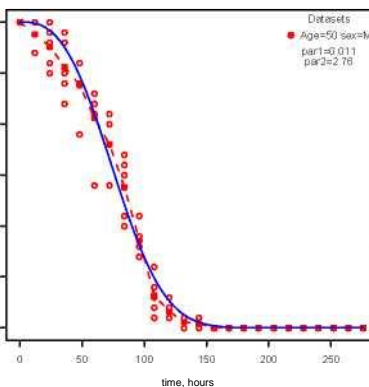

Live curves. Stress=12

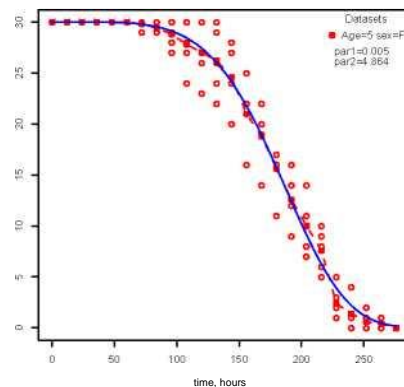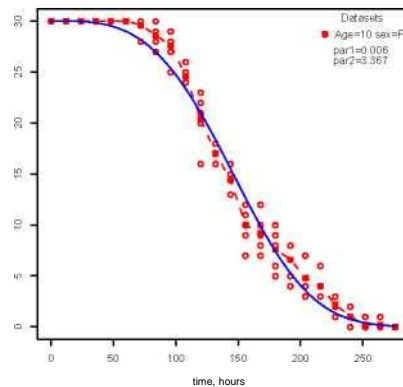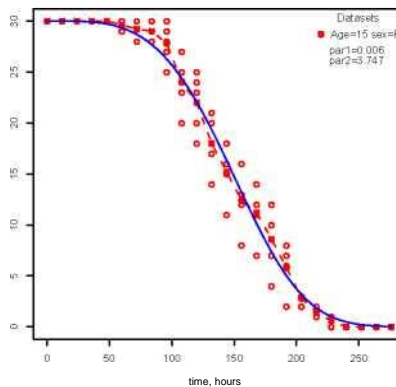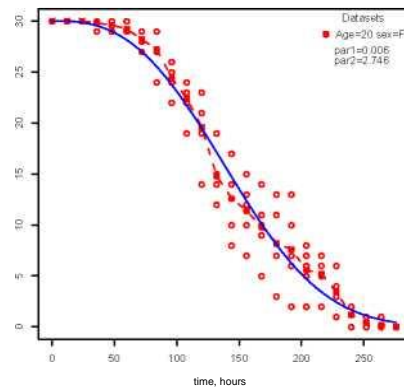

Live curves. Stress=12

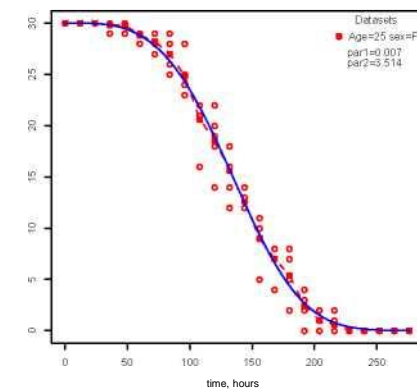

Live curves. Stress=12

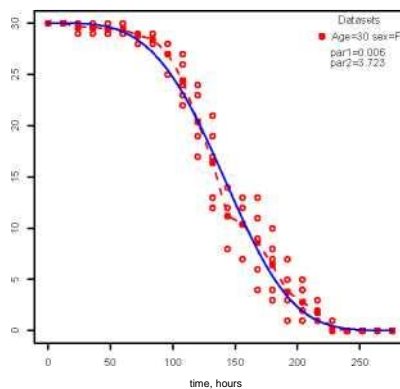

Live curves. Stress=12

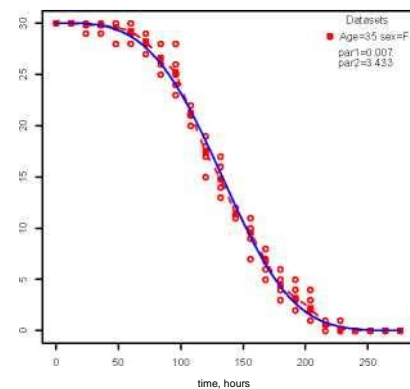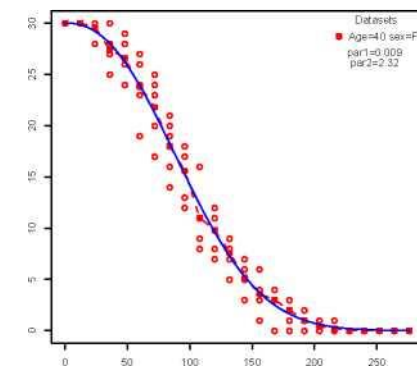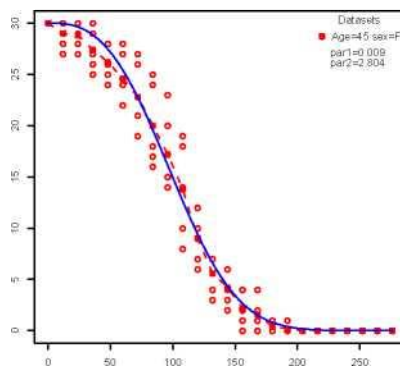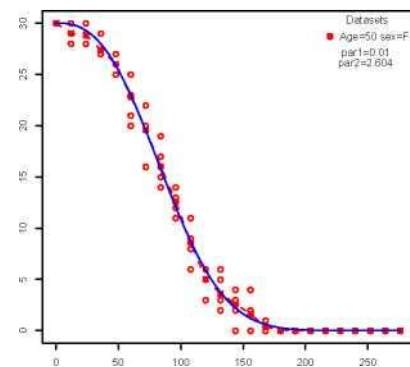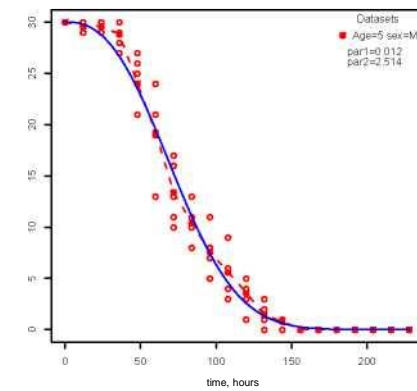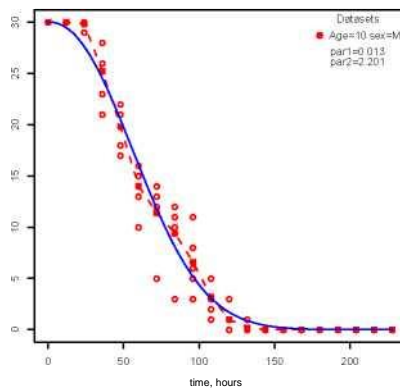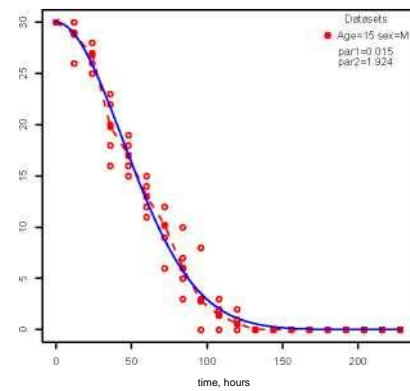

Live curves. Stress=13

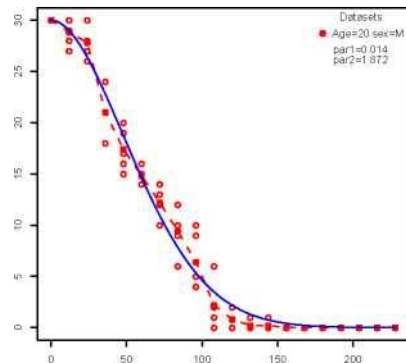

Live curves. Stress=13

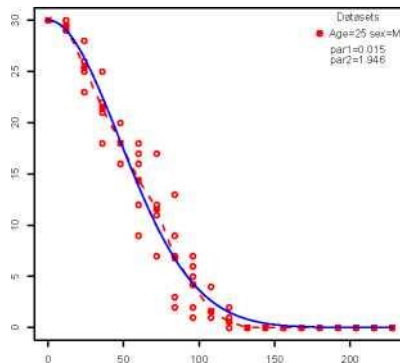

Live curves. Stress=13

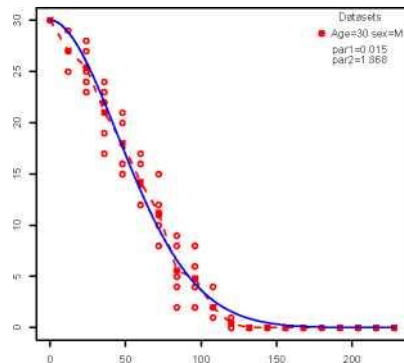

Live curves. Stress=13

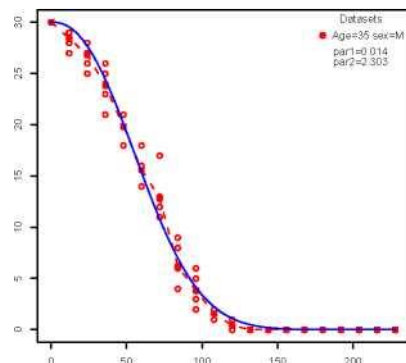

Live curves. Stress=13

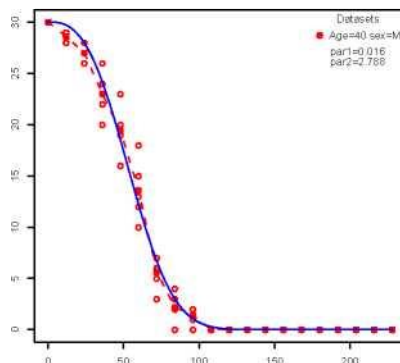

Live curves. Stress=13

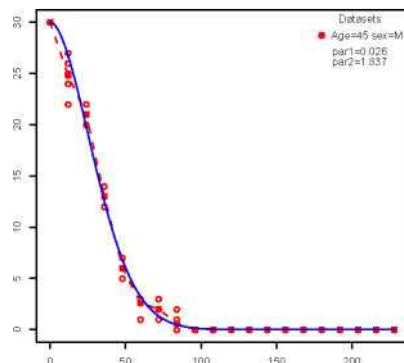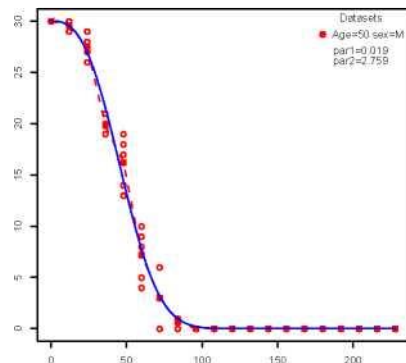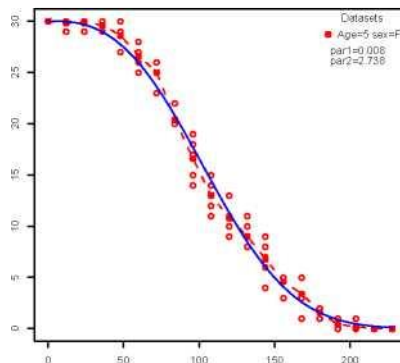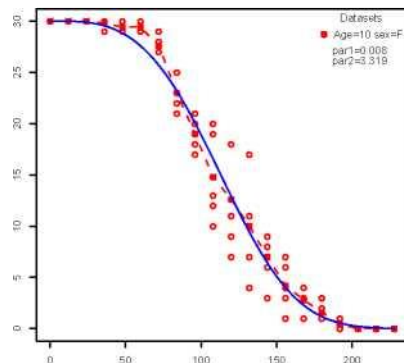

time, hours

time, hours

time, hours

Live curves. Stress=13

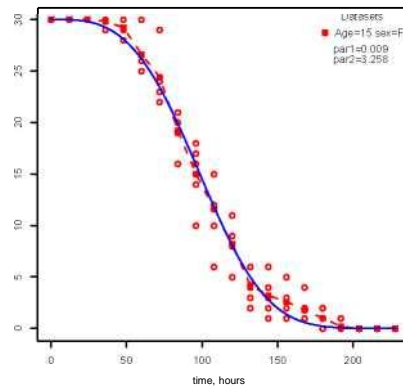

Live curves. Stress=13

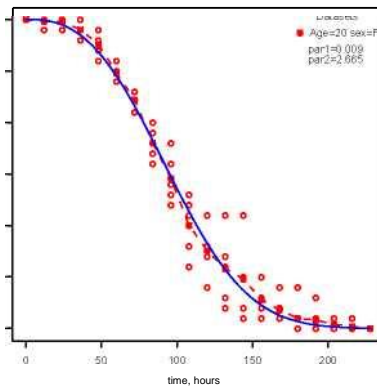

Live curves. Stress=13

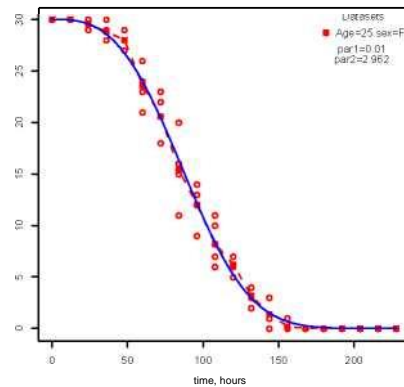

Live curves. Stress=13

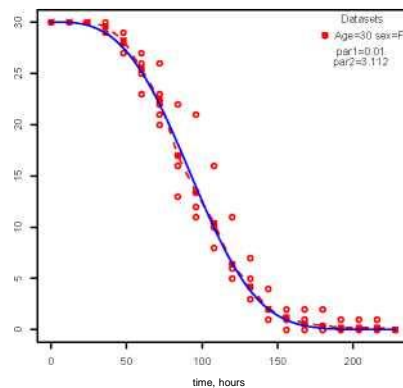

Live curves. Stress=13

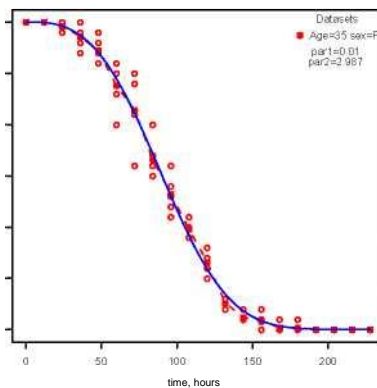

Live curves. Stress=13

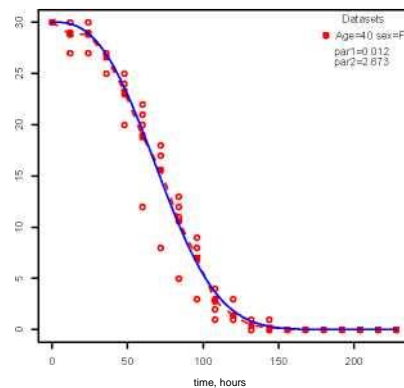

Live curves. Stress=13

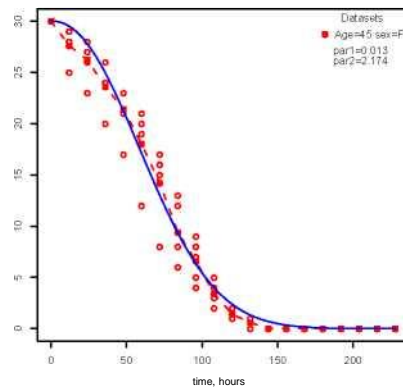

Live curves. Stress=13

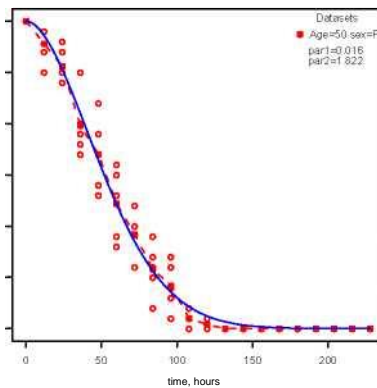

Supplement: s1 [file s1]
