# Supplementary material for: The Resistance of Drosophila melanogaster to Oxidative, Genotoxic, Proteotoxic, Osmotic Stress, Infection, and Starvation Depends on Age According to the Stress Factor
Source: MDPI journal article supplement (doi:10.3390/antiox9121239), 2020-12-07
Supplement: s1 [file s1]

# The resistance of *Drosophila melanogaster* to oxidative, genotoxic, proteotoxic, osmotic stress, infection and starvation depends on age according to the stress factor

Alexei A. Belyi, Alexey A. Alekseev, Alexander Y. Fedintsev, Stepan N. Balybin, Ekaterina N. Proshkina, Mikhail V. Shaposhnikov and Alexey A. Moskalev

Online Resource 4

The data on *Drosophila melanogaster* stress resistance at different ages are presented below.

The effect of age on the survival rate of *Drosophila* after exposure to different stresses.

| Variant of experiment  |            | Sex                   |           |             |                       |           |             |
|------------------------|------------|-----------------------|-----------|-------------|-----------------------|-----------|-------------|
| Stressor               | Age (days) | Male                  |           |             | Female                |           |             |
|                        |            | Mean $\pm$ SE (hours) | M (hours) | 90% (hours) | Mean $\pm$ SE (hours) | M (hours) | 90% (hours) |
| Paraquat               | 5          | 96.1 $\pm$ 1.3        | 96        | 120         | 87 $\pm$ 1.9          | 96        | 120         |
| Paraquat               | 10         | 67.8 $\pm$ 1.8        | 72        | 96          | 77.3 $\pm$ 1.9        | 72        | 108         |
| Paraquat               | 15         | 46.7 $\pm$ 0.9        | 48        | 72          | 51.7 $\pm$ 1.3        | 60        | 84          |
| Paraquat               | 20         | 46.2 $\pm$ 1.2        | 48        | 72          | 47 $\pm$ 1.4          | 48        | 72          |
| Paraquat               | 25         | 28.2 $\pm$ 0.8        | 36        | 60          | 34.5 $\pm$ 1.6        | 36        | 60          |
| Paraquat               | 30         | 24.2 $\pm$ 1          | 24        | 48          | 21.7 $\pm$ 1.1        | 24        | 48          |
| Paraquat               | 35         | 21.1 $\pm$ 0.7        | 24        | 48          | 20.4 $\pm$ 1          | 24        | 48          |
| Paraquat               | 40         | 15.4 $\pm$ 0.5        | 24        | 48          | 15.2 $\pm$ 0.5        | 24        | 48          |
| Paraquat               | 45         | 15.9 $\pm$ 0.5        | 24        | 48          | 15.6 $\pm$ 0.5        | 24        | 48          |
| Paraquat               | 50         | 13 $\pm$ 0.3          | 24        | 48          | 12.6 $\pm$ 0.2        | 24        | 48          |
| Starvation             | 5          | 64 $\pm$ 1.3          | 60        | 84          | 52.7 $\pm$ 0.8        | 60        | 84          |
| Starvation             | 10         | 40.6 $\pm$ 0.8        | 48        | 72          | 62.6 $\pm$ 1          | 72        | 96          |
| Starvation             | 15         | 32.7 $\pm$ 0.7        | 36        | 60          | 55 $\pm$ 1.3          | 60        | 84          |
| Starvation             | 20         | 26.9 $\pm$ 0.6        | 36        | 60          | 60.9 $\pm$ 1.5        | 60        | 84          |
| Starvation             | 25         | 34.5 $\pm$ 0.9        | 36        | 60          | 68.2 $\pm$ 1.7        | 72        | 96          |
| Starvation             | 30         | 27.6 $\pm$ 0.5        | 36        | 60          | 54.3 $\pm$ 1.3        | 60        | 84          |
| Starvation             | 35         | 26.2 $\pm$ 0.6        | 36        | 60          | 43 $\pm$ 1            | 48        | 72          |
| Starvation             | 40         | 25.8 $\pm$ 0.7        | 36        | 60          | 38.3 $\pm$ 0.9        | 48        | 72          |
| Starvation             | 45         | 23 $\pm$ 0.5          | 36        | 60          | 38.9 $\pm$ 0.8        | 48        | 72          |
| Starvation             | 50         | 14 $\pm$ 0.4          | 24        | 48          | 24.5 $\pm$ 0.7        | 36        | 60          |
| Hyperthermia           | 5          | 26.7 $\pm$ 0.6        | 36        | 48          | 25.4 $\pm$ 0.6        | 36        | 48          |
| Hyperthermia           | 10         | 20.9 $\pm$ 0.4        | 24        | 48          | 21.7 $\pm$ 0.5        | 36        | 48          |
| Hyperthermia           | 15         | 14.3 $\pm$ 0.4        | 24        | 48          | 18.9 $\pm$ 0.5        | 24        | 48          |
| Hyperthermia           | 20         | 22.4 $\pm$ 0.3        | 36        | 48          | 23.4 $\pm$ 0.2        | 36        | 48          |
| Hyperthermia           | 25         | 22.9 $\pm$ 0.3        | 36        | 48          | 23.4 $\pm$ 0.2        | 36        | 48          |
| Hyperthermia           | 30         | 12.5 $\pm$ 0.2        | 24        | 48          | 17 $\pm$ 0.5          | 24        | 48          |
| Hyperthermia           | 35         | 19.1 $\pm$ 0.5        | 24        | 48          | 21.4 $\pm$ 0.4        | 36        | 48          |
| Hyperthermia           | 40         | 12 $\pm$ 0            | 24        | 48          | 12 $\pm$ 0            | 24        | 48          |
| Hyperthermia           | 45         | 12 $\pm$ 0            | 24        | 48          | 12 $\pm$ 0            | 24        | 48          |
| Hyperthermia           | 50         | 12 $\pm$ 0            | 24        | 48          | 12 $\pm$ 0            | 24        | 48          |
| 5 mM ZnCl <sub>2</sub> | 5          | 140.6 $\pm$ 5.3       | 120       | 204         | 184.5 $\pm$ 6.5       | 180       | 252         |
| 5 mM ZnCl <sub>2</sub> | 10         | 117.6 $\pm$ 3.8       | 108       | 204         | 162.5 $\pm$ 3.9       | 156       | 228         |

|                         |    |           |     |     |           |     |     |
|-------------------------|----|-----------|-----|-----|-----------|-----|-----|
| 5 mM ZnCl <sub>2</sub>  | 15 | 108.4±2.1 | 108 | 144 | 120.6±2.9 | 120 | 168 |
| 5 mM ZnCl <sub>2</sub>  | 20 | 107±2.6   | 108 | 144 | 120±3.3   | 108 | 180 |
| 5 mM ZnCl <sub>2</sub>  | 25 | 110.1±2   | 108 | 144 | 109.8±2.4 | 108 | 156 |
| 5 mM ZnCl <sub>2</sub>  | 30 | 94.8±2.6  | 96  | 132 | 103.7±2.6 | 108 | 144 |
| 5 mM ZnCl <sub>2</sub>  | 35 | 99.3±2.3  | 96  | 132 | 96.1±2.6  | 96  | 132 |
| 5 mM ZnCl <sub>2</sub>  | 40 | 95.6±1.9  | 96  | 120 | 88.8±2    | 84  | 120 |
| 5 mM ZnCl <sub>2</sub>  | 45 | 79±2.3    | 84  | 108 | 78.1±2.7  | 72  | 120 |
| 5 mM ZnCl <sub>2</sub>  | 50 | 83.7±2.1  | 84  | 108 | 90.7±3    | 84  | 132 |
| 10 mM ZnCl <sub>2</sub> | 5  | 87.7±1.7  | 84  | 120 | 87±1.8    | 84  | 120 |
| 10 mM ZnCl <sub>2</sub> | 10 | 96.3±1.3  | 96  | 120 | 85.8±2.6  | 84  | 132 |
| 10 mM ZnCl <sub>2</sub> | 15 | 71±1.4    | 72  | 96  | 87.3±2.3  | 84  | 120 |
| 10 mM ZnCl <sub>2</sub> | 20 | 66.6±1.7  | 72  | 96  | 82.8±1.7  | 84  | 108 |
| 10 mM ZnCl <sub>2</sub> | 25 | 61.9±1.5  | 60  | 84  | 74.5±1.9  | 72  | 108 |
| 10 mM ZnCl <sub>2</sub> | 30 | 58.7±1.3  | 60  | 84  | 77.1±2    | 72  | 108 |
| 10 mM ZnCl <sub>2</sub> | 35 | 60.7±1.3  | 60  | 84  | 67.8±1.7  | 72  | 96  |
| 10 mM ZnCl <sub>2</sub> | 40 | 44.7±1.3  | 48  | 72  | 62.8±2    | 60  | 96  |
| 10 mM ZnCl <sub>2</sub> | 45 | 50.6±1.4  | 60  | 84  | 66.9±1.9  | 72  | 96  |
| 10 mM ZnCl <sub>2</sub> | 50 | 39±1.3    | 48  | 72  | 64±1.9    | 72  | 96  |
| 10 mM FeCl <sub>3</sub> | 5  | 141.1±3.8 | 144 | 204 | 185.6±3.5 | 192 | 240 |
| 10 mM FeCl <sub>3</sub> | 10 | 126.5±3.9 | 132 | 204 | 155.2±3.8 | 144 | 228 |
| 10 mM FeCl <sub>3</sub> | 15 | 112.2±4.1 | 120 | 180 | 155±3.4   | 156 | 204 |
| 10 mM FeCl <sub>3</sub> | 20 | 111±4.5   | 120 | 180 | 152.3±4.4 | 132 | 240 |
| 10 mM FeCl <sub>3</sub> | 25 | 108.6±4.1 | 120 | 168 | 140.5±3.4 | 144 | 192 |
| 10 mM FeCl <sub>3</sub> | 30 | 107.9±4.3 | 108 | 180 | 147.4±3.4 | 144 | 204 |
| 10 mM FeCl <sub>3</sub> | 35 | 107.4±3.5 | 108 | 156 | 140.1±3.4 | 132 | 204 |
| 10 mM FeCl <sub>3</sub> | 40 | 86.5±3.3  | 96  | 132 | 106.6±3.7 | 108 | 168 |
| 10 mM FeCl <sub>3</sub> | 45 | 67.5±2.6  | 72  | 108 | 105.2±3.4 | 108 | 156 |
| 10 mM FeCl <sub>3</sub> | 50 | 81±2.6    | 84  | 120 | 93.6±3.1  | 96  | 144 |
| 15 mM FeCl <sub>3</sub> | 5  | 81.6±2.5  | 72  | 132 | 114.5±3.4 | 108 | 180 |
| 15 mM FeCl <sub>3</sub> | 10 | 72.2±2.4  | 60  | 120 | 120.6±2.9 | 108 | 168 |
| 15 mM FeCl <sub>3</sub> | 15 | 62.6±2.4  | 60  | 96  | 106.8±2.8 | 96  | 156 |
| 15 mM FeCl <sub>3</sub> | 20 | 68.5±2.7  | 60  | 108 | 104.4±3.3 | 96  | 156 |
| 15 mM FeCl <sub>3</sub> | 25 | 65.4±2.5  | 60  | 108 | 94.9±2.6  | 96  | 144 |
| 15 mM FeCl <sub>3</sub> | 30 | 63.8±2.6  | 60  | 108 | 100.7±2.7 | 96  | 144 |
| 15 mM FeCl <sub>3</sub> | 35 | 67.7±2.4  | 72  | 108 | 96.7±2.7  | 96  | 132 |
| 15 mM FeCl <sub>3</sub> | 40 | 60.3±1.9  | 60  | 84  | 77.7±2.4  | 84  | 108 |
| 15 mM FeCl <sub>3</sub> | 45 | 40±1.7    | 36  | 60  | 73±2.8    | 72  | 120 |
| 15 mM FeCl <sub>3</sub> | 50 | 53.5±1.5  | 60  | 84  | 61.2±2.5  | 60  | 108 |
| 10 mM CuSO <sub>4</sub> | 5  | 93.9±1.3  | 96  | 120 | 121.3±1.9 | 120 | 144 |
| 10 mM CuSO <sub>4</sub> | 10 | 104.2±1.3 | 108 | 132 | 136.2±2   | 132 | 168 |
| 10 mM CuSO <sub>4</sub> | 15 | 83.3±1.5  | 84  | 108 | 118.7±1.5 | 120 | 144 |
| 10 mM CuSO <sub>4</sub> | 20 | 71.4±1.6  | 72  | 96  | 100.8±1.7 | 96  | 132 |
| 10 mM CuSO <sub>4</sub> | 25 | 76.7±1.2  | 84  | 108 | 104.7±1.7 | 108 | 132 |
| 10 mM CuSO <sub>4</sub> | 30 | 69±1.4    | 72  | 96  | 100.8±2.1 | 108 | 132 |
| 10 mM CuSO <sub>4</sub> | 35 | 65.1±1.3  | 72  | 96  | 91.6±1.9  | 96  | 120 |
| 10 mM CuSO <sub>4</sub> | 40 | 60.6±2    | 60  | 96  | 92.6±1.9  | 96  | 120 |
| 10 mM CuSO <sub>4</sub> | 45 | 65.4±1.4  | 60  | 96  | 86.3±2.8  | 96  | 120 |
| 10 mM CuSO <sub>4</sub> | 50 | 51.4±1.9  | 60  | 84  | 78.9±2.2  | 84  | 108 |
| 15 mM CuSO <sub>4</sub> | 5  | 76.7±1.2  | 84  | 108 | 95.8±1.4  | 96  | 120 |
| 15 mM CuSO <sub>4</sub> | 10 | 59.4±1    | 60  | 84  | 88.4±1.4  | 96  | 120 |
| 15 mM CuSO <sub>4</sub> | 15 | 47.8±1.2  | 48  | 72  | 85.7±1.5  | 84  | 108 |
| 15 mM CuSO <sub>4</sub> | 20 | 44.2±1.2  | 48  | 72  | 87.6±1.8  | 84  | 108 |
| 15 mM CuSO <sub>4</sub> | 25 | 39.4±1.1  | 36  | 60  | 71±1.3    | 72  | 96  |
| 15 mM CuSO <sub>4</sub> | 30 | 40.4±1    | 48  | 72  | 72.6±1.6  | 72  | 96  |
| 15 mM CuSO <sub>4</sub> | 35 | 37.4±1    | 36  | 60  | 68.9±1.5  | 72  | 96  |

|                         |    |           |     |     |           |     |     |
|-------------------------|----|-----------|-----|-----|-----------|-----|-----|
| 15 mM CuSO <sub>4</sub> | 40 | 32.6±1.1  | 36  | 60  | 52.7±1.7  | 48  | 84  |
| 15 mM CuSO <sub>4</sub> | 45 | 20.6±0.8  | 24  | 48  | 45.4±1.9  | 36  | 84  |
| 15 mM CuSO <sub>4</sub> | 50 | 26.7±0.9  | 36  | 60  | 41.4±1.7  | 36  | 72  |
| 400 mM NaCl             | 5  | 105.4±1.3 | 108 | 132 | 91.7±1.4  | 96  | 120 |
| 400 mM NaCl             | 10 | 93.8±1.2  | 96  | 120 | 104.6±1.4 | 108 | 132 |
| 400 mM NaCl             | 15 | 86±1.5    | 96  | 120 | 92.2±1.9  | 96  | 120 |
| 400 mM NaCl             | 20 | 73.1±1.6  | 72  | 96  | 71.8±1.4  | 72  | 96  |
| 400 mM NaCl             | 25 | 55.8±1.4  | 60  | 84  | 70.3±1.6  | 72  | 96  |
| 400 mM NaCl             | 30 | 49.1±1.4  | 48  | 72  | 64.8±1.5  | 60  | 96  |
| 400 mM NaCl             | 35 | 43.6±1    | 48  | 72  | 53.7±1.5  | 48  | 84  |
| 400 mM NaCl             | 40 | 35.7±1    | 36  | 60  | 49.4±1.5  | 48  | 72  |
| 400 mM NaCl             | 45 | 38.6±1.1  | 48  | 72  | #3HAЧ!    | 48  | 72  |
| 400 mM NaCl             | 50 | 24.3±0.9  | 24  | 48  | 31.8±1.2  | 36  | 60  |
| 1 mM CdCl <sub>2</sub>  | 5  | 128.8±1.1 | 132 | 156 | 127±1.3   | 132 | 156 |
| 1 mM CdCl <sub>2</sub>  | 10 | 113.5±1.3 | 120 | 144 | 129.8±1.7 | 132 | 156 |
| 1 mM CdCl <sub>2</sub>  | 15 | 110.1±1.3 | 108 | 132 | 115.6±1.4 | 120 | 144 |
| 1 mM CdCl <sub>2</sub>  | 20 | 104.7±1   | 108 | 132 | 108.1±1.5 | 108 | 132 |
| 1 mM CdCl <sub>2</sub>  | 25 | 110.4±1.1 | 120 | 144 | 99.5±1.4  | 96  | 120 |
| 1 mM CdCl <sub>2</sub>  | 30 | 108.2±1.4 | 108 | 132 | 107.7±1.6 | 108 | 132 |
| 1 mM CdCl <sub>2</sub>  | 35 | 107.3±1.6 | 108 | 132 | 106.2±1.7 | 108 | 132 |
| 1 mM CdCl <sub>2</sub>  | 40 | 97.7±1.5  | 96  | 120 | 96.9±1.6  | 96  | 120 |
| 1 mM CdCl <sub>2</sub>  | 45 | 92.1±1.5  | 96  | 120 | 86.9±1.6  | 84  | 108 |
| 1 mM CdCl <sub>2</sub>  | 50 | 80.5±1.6  | 96  | 120 | 73.8±1.6  | 84  | 108 |
| 5 mM CdCl <sub>2</sub>  | 5  | 65.4±1.3  | 72  | 96  | 83±1.4    | 84  | 108 |
| 5 mM CdCl <sub>2</sub>  | 10 | 43.6±1.3  | 48  | 72  | 69.4±1.6  | 72  | 96  |
| 5 mM CdCl <sub>2</sub>  | 15 | 48.6±1.5  | 48  | 72  | 70.3±1.7  | 72  | 96  |
| 5 mM CdCl <sub>2</sub>  | 20 | 47.8±1.3  | 48  | 72  | 64.9±1.4  | 72  | 96  |
| 5 mM CdCl <sub>2</sub>  | 25 | 38.6±1.4  | 36  | 60  | 55.3±1.6  | 48  | 84  |
| 5 mM CdCl <sub>2</sub>  | 30 | 38.2±1.3  | 36  | 60  | 55.8±1.8  | 60  | 84  |
| 5 mM CdCl <sub>2</sub>  | 35 | 31.9±0.8  | 36  | 60  | 46.7±1.7  | 48  | 72  |
| 5 mM CdCl <sub>2</sub>  | 40 | 29.5±0.9  | 36  | 60  | 39.4±1.6  | 36  | 60  |
| 5 mM CdCl <sub>2</sub>  | 45 | 31.6±1    | 36  | 60  | 39.6±1.6  | 36  | 60  |
| 5 mM CdCl <sub>2</sub>  | 50 | 22±0.7    | 24  | 48  | 26.6±1.1  | 36  | 60  |
| Infection               | 5  | 147.6±3.3 | 144 | 204 | 138.6±3.4 | 132 | 204 |
| Infection               | 10 | 139.6±2.9 | 144 | 180 | 131.7±2.9 | 132 | 180 |
| Infection               | 15 | 153.3±3.1 | 156 | 192 | 147.3±3   | 144 | 192 |
| Infection               | 20 | 158.2±2.7 | 156 | 216 | 122.4±2.4 | 120 | 156 |
| Infection               | 25 | 146.2±3.2 | 144 | 204 | 115.6±2.5 | 108 | 144 |
| Infection               | 30 | 122±2.6   | 120 | 156 | 98.2±2    | 96  | 132 |
| Infection               | 35 | 103.5±2.7 | 108 | 144 | 88.6±2.6  | 84  | 132 |
| Infection               | 40 | 92.2±2.3  | 96  | 132 | 68.4±1.9  | 72  | 96  |
| Infection               | 45 | 83.6±2.3  | 84  | 120 | 68.5±1.9  | 60  | 96  |
| Infection               | 50 | 69±2.2    | 72  | 108 | 63.9±1.8  | 60  | 96  |

**Table A1** The effect of age on the survival rate of *Drosophila* after exposure to different stresses. Mean±SE- mean survival, M - median survival, 90% - time of death of 90% of the specimen in the sample

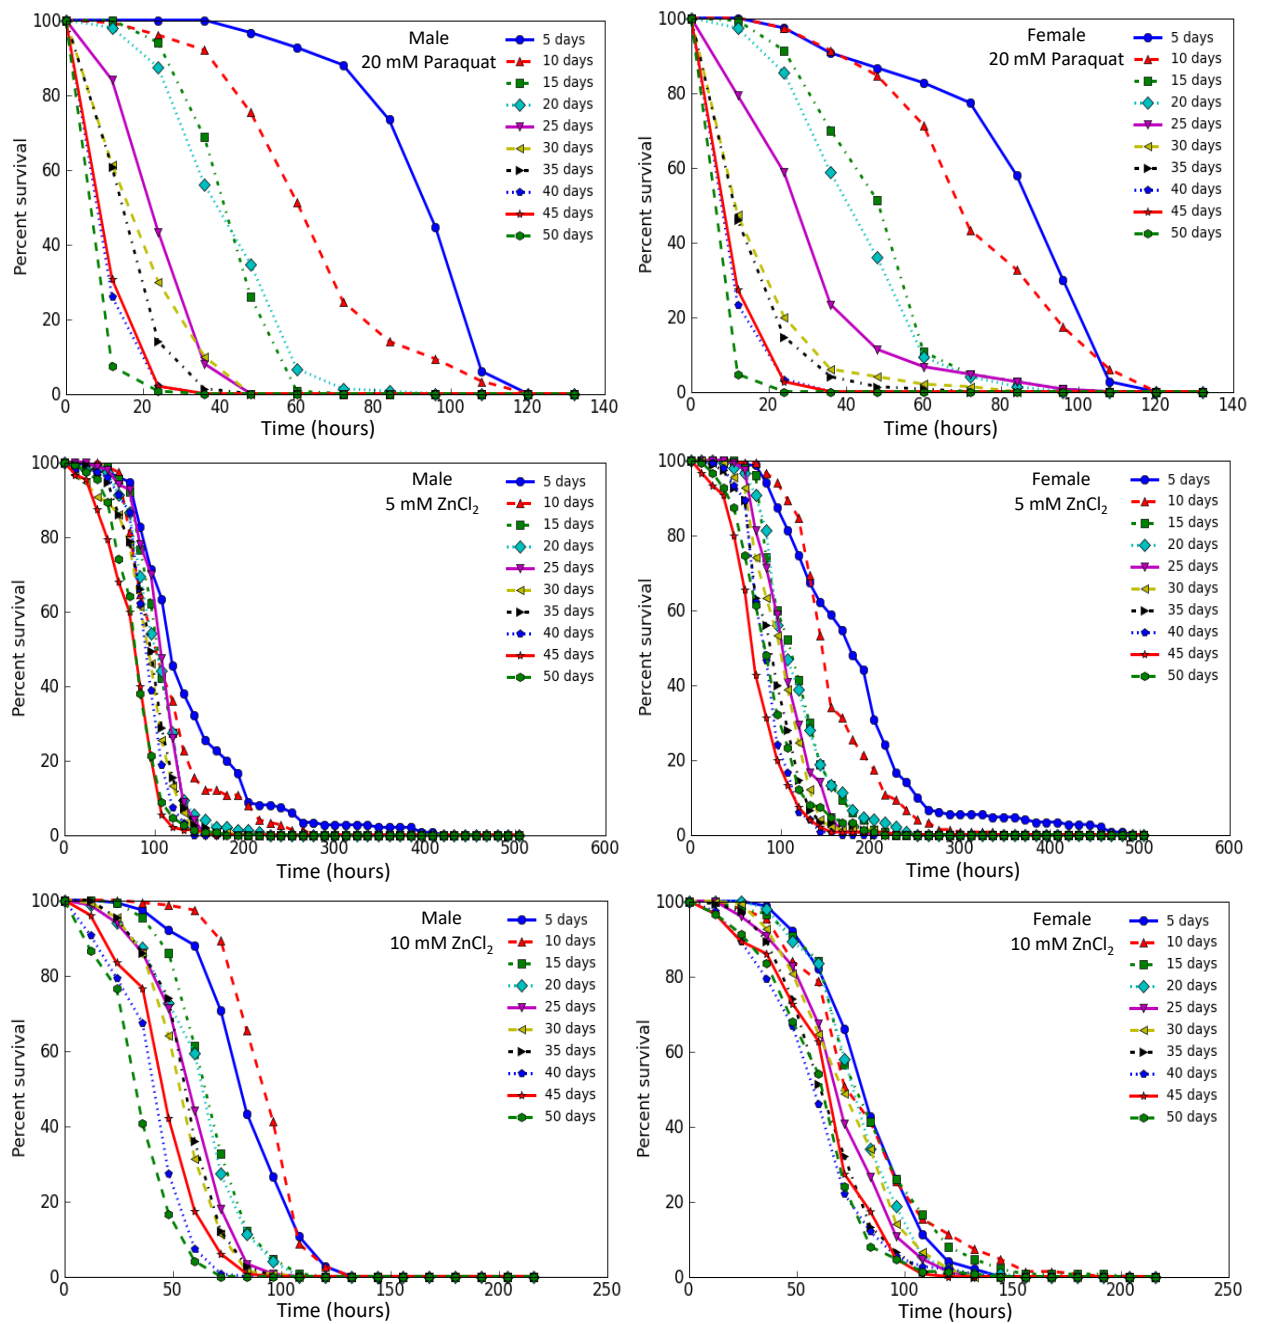

**Fig. A1** Survival curves of *D. melanogaster* at different ages under exposure of oxidative stress. The graphs show the change in survival with increasing age of flies (5, 10, ..., 50 days) under expose of the stresses

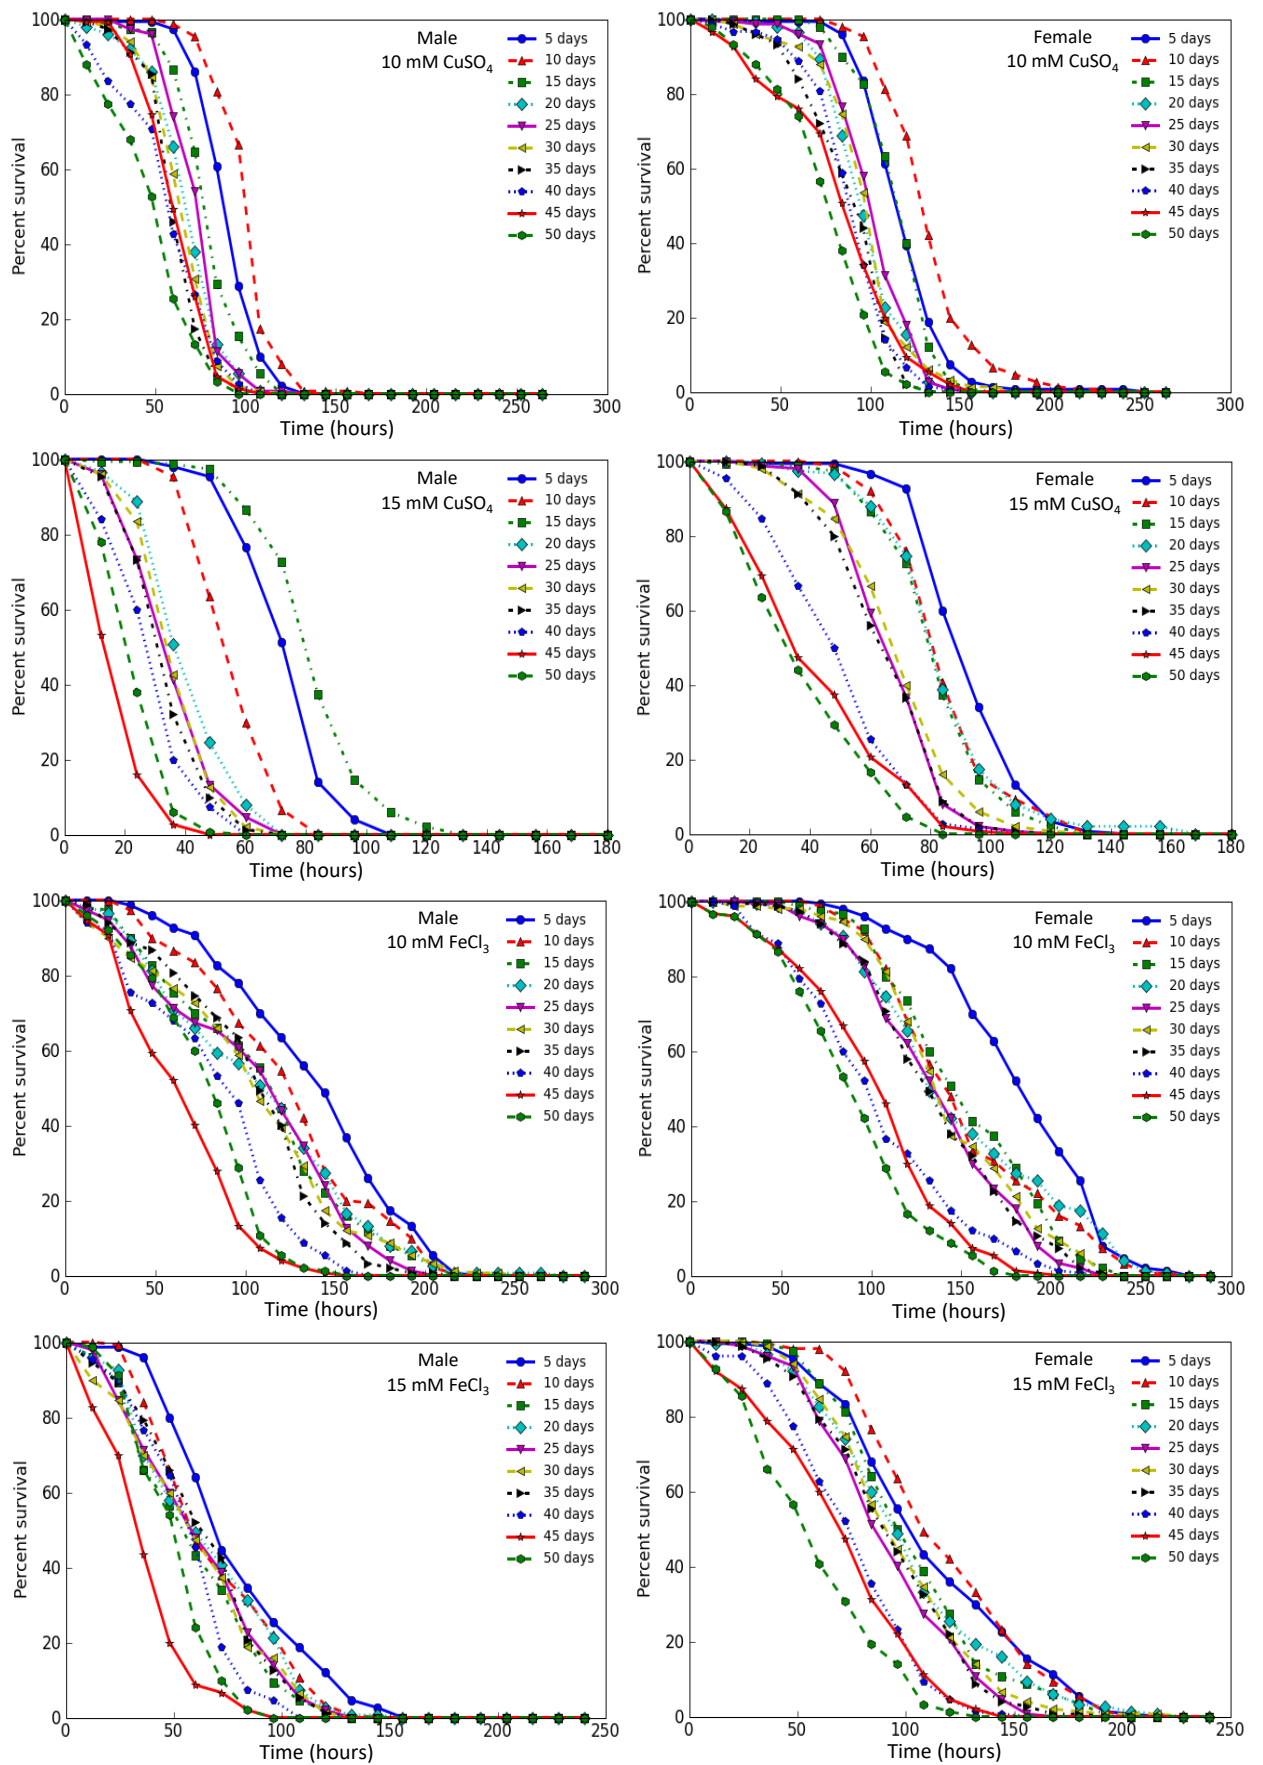

**Fig. A2** Survival curves of *D. melanogaster* at different ages under exposure of oxidative stress. The graphs show the change in survival with increasing age of flies (5, 10, ..., 50 days) under expose of the stresses

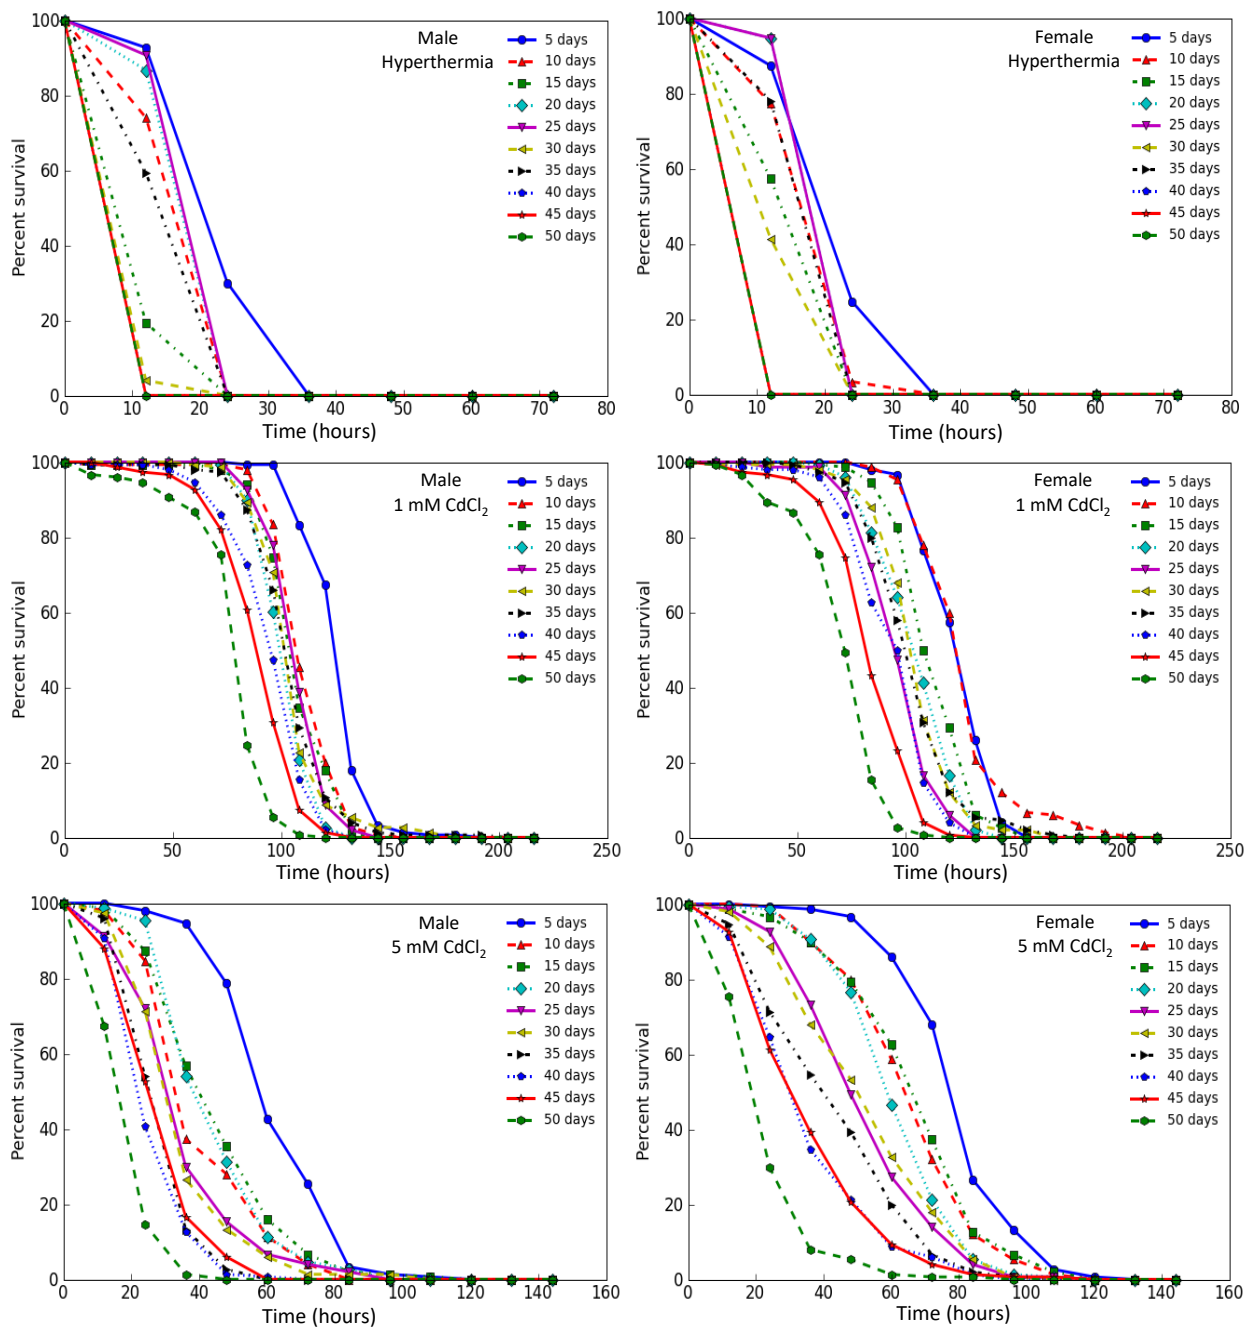

**Fig. A3** Survival curves of *D. melanogaster* at different ages under exposure of oxidative stress. The graphs show the change in survival with increasing age of flies (5, 10, ..., 50 days) under expose of the stresses

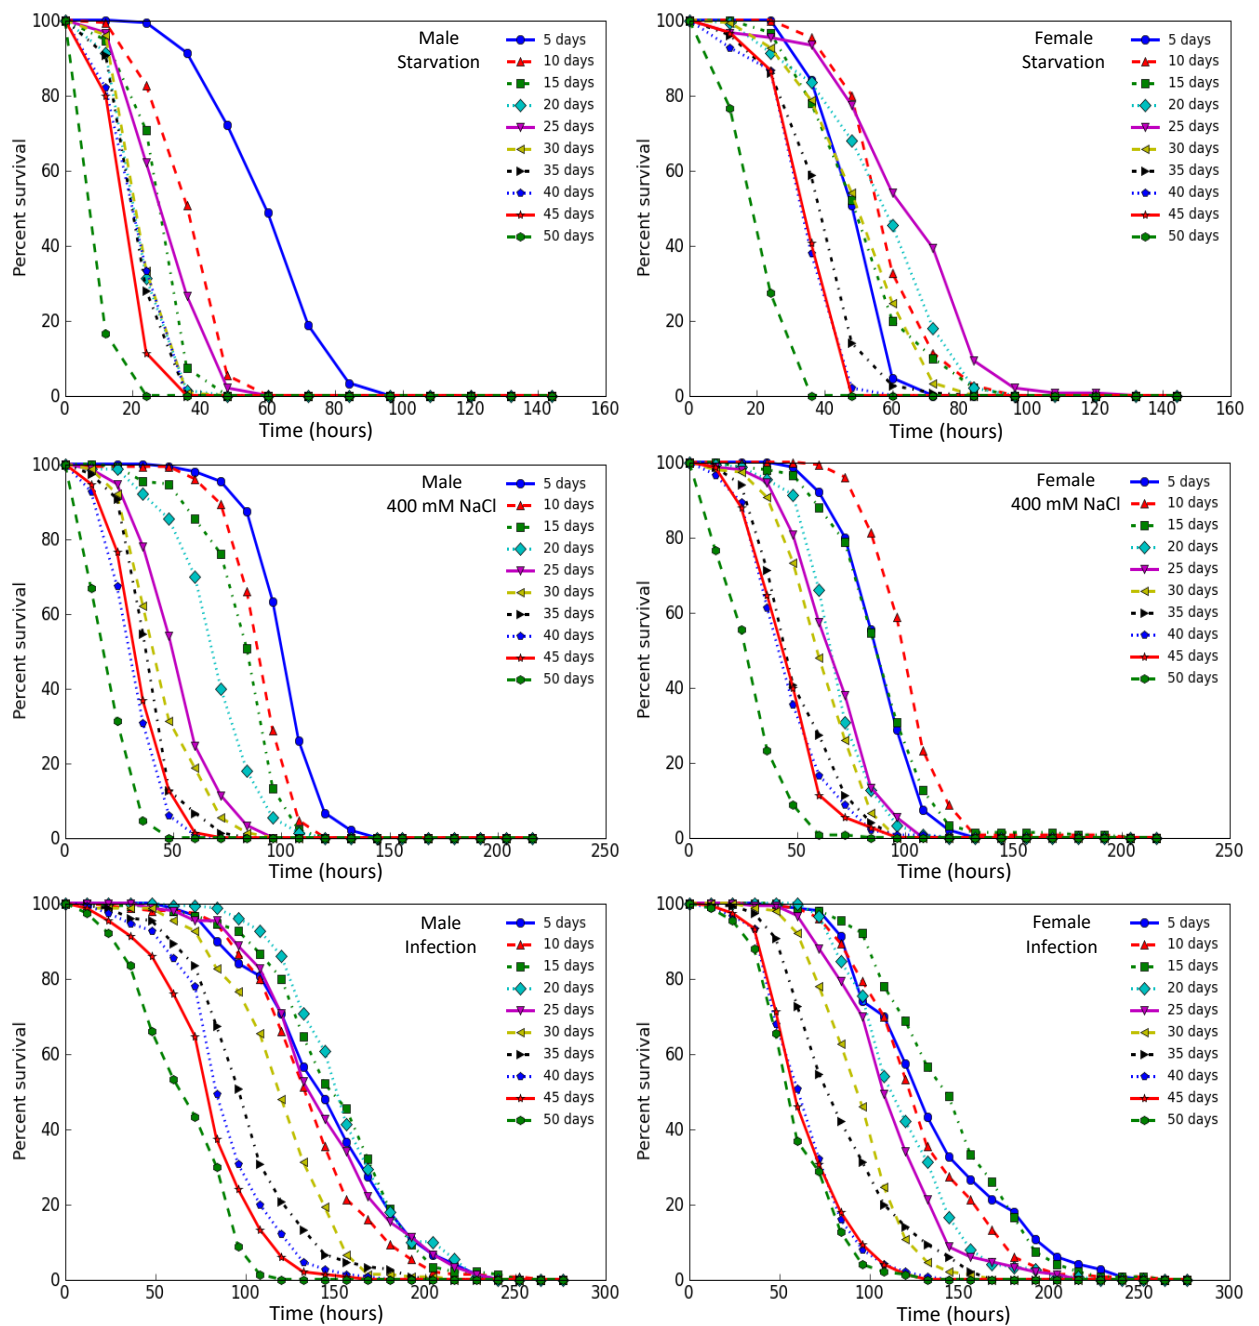

**Fig. A4** Survival curves of *D. melanogaster* at different ages under exposure of oxidative stress. The graphs show the change in survival with increasing age of flies (5, 10, ..., 50 days) under expose of the following stresses: starvation (a – male, b - female), 400 mM NaCl (c – male, d - female), infection by *B. bassiana* (e – male, f - female)
