# Supplementary material for: The Resistance of Drosophila melanogaster to Oxidative, Genotoxic, Proteotoxic, Osmotic Stress, Infection, and Starvation Depends on Age According to the Stress Factor
Source: Antioxidants (Basel). 2020 Dec 7;9(12):1239. doi: 10.3390/antiox9121239 (PMC7762242; doi:10.3390/antiox9121239)
Supplement: Supplementary file 1 [file antioxidants-09-01239-s001.zip]

Archive with 4 entries (4 files):
- Online Resource 1.pdf
- Online Resource 2.pdf
- Online Resource 3.pdf
- Online Resource 4.pdf
